# QuNex – An Integrative Platform for Reproducible Neuroimaging Analytics

Jie Lisa Ji<sup>a,+,\*</sup>, Jure Demšar<sup>b,c,+</sup>, Clara Fonteneau<sup>a</sup>, Zailyn Tamayo<sup>a</sup>, Lining Pan<sup>a</sup>, Aleksij Kraljič<sup>c</sup>, Andraž Matkovič<sup>c</sup>, Nina Purg<sup>c</sup>, Markus Helmer<sup>a</sup>, Shaun Warrington<sup>d</sup>, Michael Harms<sup>e</sup>, Stamatios N. Sotiropoulos<sup>d,f</sup>, John D. Murray<sup>a,g,h</sup>, Alan Anticevic<sup>a,g,h,+,\*\*</sup>, and Grega Repovš<sup>c,++</sup>

<sup>a</sup>Department of Psychiatry, Yale University School of Medicine, New Haven, CT, USA

<sup>b</sup>Faculty of Computer and Information Science, University of Ljubljana, Ljubljana, Slovenia

<sup>c</sup>Department of Psychology, University of Ljubljana, Ljubljana, Slovenia

<sup>d</sup>Sir Peter Mansfield Imaging Centre, School of Medicine, University of Nottingham, UK

<sup>e</sup>Department of Psychiatry, Washington University in St. Louis, St. Louis, MO, USA

<sup>f</sup>Nottingham National Institute of Health Research (NIHR) Biomedical Research Centre, Queen's Medical Centre, University of Nottingham, UK

<sup>g</sup>Department of Physics, Yale University, New Haven, CT, USA

<sup>h</sup>Department of Psychology, Yale University School of Medicine, New Haven, CT, USA

\*Both authors contributed equally to this work

\*\*Co-senior authors

†Corresponding author

1 Neuroimaging technology has experienced explosive growth and  
2 has transformed the study of neural mechanisms across health  
3 and disease. However, given the diversity of sophisticated  
4 tools for handling neuroimaging data, the field faces challenges  
5 around method integration (1–3). Specifically, researchers of-  
6 ten have to rely on siloed approaches which limit reproducibil-  
7 ity, with idiosyncratic data organization and limited software  
8 interoperability. To address these challenges, we developed  
9 Quantitative Neuroimaging Environment & Toolbox (QuNex),  
10 a platform for consistent end-to-end processing and analytics.  
11 QuNex is engineered for reproducible deployment of custom  
12 workflows, from onboarding raw data to generating analytic  
13 features, in a single “turnkey” command. The platform en-  
14 ables inter-operable integration of multi-modal, community-  
15 developed neuroimaging software through an extension frame-  
16 work with a software development kit for seamless integration  
17 of community tools. Critically, it supports high-throughput,  
18 parallel processing in high-performance compute environments,  
19 either locally or in the cloud. Notably, QuNex has successfully  
20 processed over 10,000 scans across neuroimaging consortia (4),  
21 including multiple clinical datasets. Moreover, QuNex enables  
22 integration of non-human primate, rodent, and human work-  
23 flows via a cohesive translational platform. Collectively, this ef-  
24 fort stands to significantly impact neuroimaging method inte-  
25 gration across acquisition approaches, pipelines, datasets, com-  
26 putational environments, and species. Building on this platform  
27 will enable more rapid, scalable, and reproducible impact of  
28 neuroimaging technology across health and disease.

29 neuroimaging, data processing, functional MRI, diffusion MRI, multi-modal  
30 analyses, containerization, cloud integration, high-performance computing,  
31 cross-species analyses

32 Correspondence: [jielisa.ji@yale.edu](mailto:jielisa.ji@yale.edu)

## 33 Introduction

34 Neuroimaging has transformed the study of the central  
35 nervous system across species, developmental stages, and  
36 health/disease states. The impact of neuroimaging research  
37 has led to the development of a diverse and growing ar-  
38 ray of tools and pipelines that address distinct aspects of  
39 data management, preprocessing, and analysis (e.g. AFNI  
40 (5), FreeSurfer (6), FSL (7), SPM (8), HCP (9), fMRIPrep

(10), QSIPrep (11), PALM (12)). However, the growing  
42 array of neuroimaging tools has created challenges for in-  
43 tegration of such methods across modalities, species, and  
44 analysis choices. Furthermore, different neuroimaging tech-  
45 niques (e.g., functional magnetic resonance imaging/fMRI,  
46 diffusion magnetic resonance imaging/dMRI, arterial spin la-  
47 belling/ASL, task-evoked versus resting-state etc.) have of-  
48 ten spurred the creation of methodology-specific silos with  
49 limited interoperability across tools. This has contributed to  
50 a fragmented neuroimaging community in lieu of integrative  
51 workflows that facilitate standardized and reproducible work-  
52 flows in the field (13).

53 A number of coordinated efforts have attempted acquisi-  
54 tion and processing standardization. For example, the Hu-  
55 man Connectome Project’s Minimal Preprocessing Pipelines  
56 (HCP MPP) (9) allow quality control (QC) and distortion cor-  
57 rection for several neuroimaging modalities through a unified  
58 framework, while considering multiple formats for preserv-  
59 ing the geometry of different brain structures (surfaces for  
60 the cortical sheet and volumes for deep structures). Another  
61 state-of-the-art preprocessing framework, fMRIPrep (10), fo-  
62 cuses on fMRI, seeking to ensure high-quality automated pre-  
63 processing and integrated QC. FSL’s XTRACT (14) allows  
64 consistent white matter bundle tracking in human and non-  
65 human primate dMRI. Such efforts have been instrumental  
66 in guiding the field towards unified and consistent handling  
67 of data and increasing accessibility for users to state-of-the-  
68 art tools. However, these solutions are mostly application-  
69 or modality-specific, and therefore are not designed to en-  
70 able an integrative workflow framework that is modality- and  
71 method-agnostic.

72 To address this need, we have developed the Quantitative  
73 Neuroimaging Environment and Toolbox (QuNex). QuNex  
74 is designed as an integrative platform for reproducible neu-  
75 roimaging analytics. Specifically, QuNex enables researchers  
76 to seamlessly execute data onboarding and preparation, pre-  
77 processing, QC, feature generation, and statistical analyses  
78 in an integrative and reproducible manner. The “turnkey”  
79 end-to-end execution capability allows entire study work-

flows, from data onboarding to statistical analyses, to be customized and executed through a single command. Furthermore, QuNex is optimized for high performance computing (HPC) or cloud-based environments to enable high-throughput parallel processing of large-scale neuroimaging datasets (such as Adolescent Brain Cognitive Development (15) or the UK Biobank (16)). In fact, QuNex has been adopted as the platform of choice for executing workflows across all Lifespan and Connectomes of Human Disease datasets by the Connectome Coordinating Facility (CCF) (4). Critically, we have developed QuNex to integrate and facilitate use of existing software packages, while enhancing their functionality through a rich array of internal features. For instance, QuNex supports a number of popular and well-validated neuroimaging tools, with a framework for extensibility and integration of additional tools (see **Discussion**). Moreover, QuNex offers functionality for onboarding entire datasets, with compatibility for the BIDS (Brain Imaging Data Structure, (17)) or HCP-style conventions, as well as support for NIFTI (volumetric), GIFTI (surface meshes), CIFTI (grayordinates), and DICOM file formats. Lastly, QuNex enables analysis of non-human primate (18) and rodent (mouse) (19) datasets in a complementary manner to human neuroimaging workflows. To our knowledge, no framework provides an integrative solution to handle the diversity of neuroimaging workflows across species, modalities, pipelines, analytic workflows, datasets, and scanner manufacturers, while explicitly enabling methodological extensibility and innovation.

QuNex offers an integrative solution that minimizes technical bottlenecks and access friction for executing standardized neuroimaging workflows at scale with reproducible standards. Here we present the QuNex environment through specific example use cases: 1) Turnkey execution of neuroimaging workflows and versatile selection of data for high-throughput batch processing with native scheduler support; 2) Consistent and standardized processing of datasets of various sizes, modalities, study types, and quality; 3) Multi-modal feature generation at different levels of resolution; 4) Comprehensive and flexible general linear modelling at the single-session level and integrated interoperability with third-party tools for group-level analytics; 5) Support for multi-species neuroimaging data, to link, unify and translate between human and non-human studies. We use data sampled from the over 10,000 scan sessions that QuNex has been used to process across neuroimaging consortia, including clinical datasets. Notably, we present the native support for open science through the QuNex Software Development Kit (SDK). In summary, QuNex enables critical opportunities for reproducibility and method innovation, with a focus on integrating across the diverse array of tools in the neuroimaging community.

## Results

QuNex is a unified software platform that enables researchers to perform all of the steps required in state-of-the-art neuroimaging studies, starting with onboarding data from vari-

ous formats and organizations (e.g., DICOM, Bruker, HCP-style, BIDS); continuing with state-of-the-art preprocessing pipelines (e.g., the HCP MPP) and quality control steps; and ending with final analyses (e.g., whole brain or ROI activation or connectivity analyses, tractography). Through QuNex, researchers can use a single platform to perform onboarding, preprocessing, QC and analyses across multiple modalities and species. The developed platform is open source and community driven. To promote community participation, we have adopted modern and flexible development standards and implemented several supporting tools, including a Software Development Kit (SDK) that includes helper tools for setting up a development environment and testing newly developed code, and an extensions framework through which researchers can integrate their own pipelines into the QuNex platform. These tools enable users to speed up both their development and integration of newly developed features into the core codebase. QuNex comes with an extensive documentation both in the format of inline help through the command line interface (CLI) and a dedicated Wiki page. Furthermore, users can visit our forum (<https://forum.qunex.yale.edu/>) for anything QuNex related, from discussions to feature requests, bug reports, issues, and usage assistance.

**QuNex is an Integrative Multi-modal, Multi-species Neuroimaging Platform.** QuNex provides a platform for seamless integration of a wide array of neuroimaging operations, ranging from low-level onboarding of raw data to final cutting-edge surface-based analyses and visualizations. **Figure 1** provides a general overview of the QuNex platform and a summary of QuNex commands and functionalities is shown in **Figure S1**. QuNex supports processing of diverse data from multiple species (human, macaque and mouse), modalities (T1w, T2w, BOLD, DWI), and common neuroimaging data formats (e.g. DICOM, PAR/REC, NIFTI and Bruker). It offers support for onboarding of BIDS-compliant or HCP-style datasets and native support for studies that combine neuroimaging with behavioral assessments. Furthermore, it allows for the integration of behavioral data, such as task performance or symptom assessments, and implements final analyses of data arising from studies that combine neuroimaging with behavioral data, with a clear grammar for organizing the data hierarchy across behavior and neural modalities for a single study (**Figure S2**). Because of containerization the platform is fully platform-agnostic and comes in the form of both Docker and Singularity containers which allows for easy deployment regardless of the underlying hardware or operating system.

QuNex is capable of generating multi-modal features both at the single subject level and at the group level. It enables extraction of structural features from T1w and T2w data (e.g. myelin, cortical thickness, sulcal depth and curvature), structural connectivity features from diffusion weighted imaging (DWI) data (whole-brain “dense” connectomes, regional connectivity, white matter tract segmentation) and functional features from BOLD imaging (e.g. activation maps and peaks, functional connectivity matrices or connectomes).

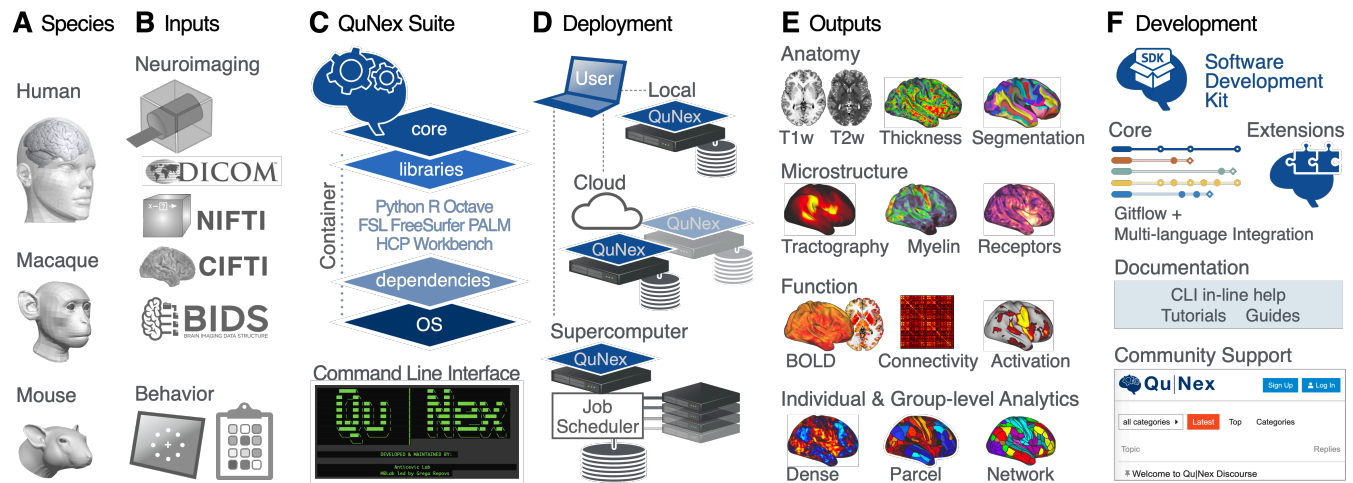

**Fig. 1. QuNex Provides an Integrated, Versatile and Flexible Neuroimaging Platform.** **A)** QuNex supports processing of input data from multiple species, including human, macaque and mouse. **B)** Additionally, data can be onboarded from a variety of popular formats, including neuroimaging data in DICOM, PAR/REC, NIFTI formats, a full BIDS dataset, or behavioral data from task performance or symptom assessments. **C)** The QuNex platform is available as a container for ease of distribution, portability and execution. The QuNex container can be accessed via the command line and contains all the necessary packages, libraries and dependencies needed for running processing and analytic functions. **D)** QuNex is designed to be easily scalable to accommodate a variety of datasets and job sizes. From a user access point (i.e. the user's local machine), QuNex can be deployed locally, on cloud servers, or via job schedulers in supercomputer environments. **E)** QuNex outputs multi-modal features at the single subject and group levels. Supported features that can be extracted from individual subjects include structural features from T1w, T2w and DWI (such as myelin, cortical thickness, sulcal depth and curvature) and functional features from BOLD imaging (such as functional connectivity matrices). Features can be extracted at the dense, parcel, or network levels. **F)** Importantly, QuNex also provides a comprehensive set of tools for community contribution, engagement and support. A Software Development Kit (SDK) and GitFlow-powered DevOps framework is provided for community-developed extensions. A forum (<https://forum.qunex.yale.edu>) is available for users to engage with the QuNex developer team to ask questions, report bugs and/or provide feedback.

193 Features can be extracted at the dense, parcel, or network 224  
194 levels. 225

195 **Turnkey Engine Automates Processing via a Single** 226  
196 **Command.** Efficient processing of neuroimaging datasets 227  
197 require streamlined workflows that can execute multiple 228  
198 steps, from data onboarding to performing analytics, with 229  
199 minimal manual intervention. One of the most powerful 230  
200 QuNex features is its “turnkey” engine, accessible through 231  
201 the `run_turnkey` command. The turnkey functionality al- 232  
202 lows users to chain and execute several QuNex commands 233  
203 using a single command line call, enabling the generation of 234  
204 consistent outputs in an efficient, streamlined manner. The 235  
205 turnkey steps are entirely configurable and modular, such that 236  
206 users can customize workflows to suit their specific needs. 237  
207 An example of an end-to-end workflow is shown in **Figure** 238  
208 **2A**. The QuNex turnkey engine supports data onboarding of 239  
209 the most commonly used neuroimaging formats, state-of-the- 240  
210 art preprocessing pipelines (e.g. HCP MPP (9), see **Figure** 241  
211 **S3**) and denoising techniques, as well as steps for data qual- 242  
212 ity control. QuNex expands upon preprocessing functionali- 243  
213 ties provided by other packages by providing a robust visual 244  
214 QC function (**Figure S4**) which simplifies thorough valida- 245  
215 tion of the quality of neural data and preprocessing interme- 246  
216 diate and final outputs, across multiple modalities (including 247  
217 T1w, T2w, myelin, DWI, and BOLD). Users can additionally 248  
218 choose to generate neural features for use in analyses, includ- 249  
219 ing parcellation of timeseries and functional connectivity. 250

220 **Filtering Grammar Enables Flexible Selection of** 252  
221 **Study-Specific Data Processing.** Flexible selection of 253  
222 sessions/scans for specific steps is an essential feature for 254  
223 dataset management, especially datasets with multiple sites, 255

scanners, participants groups, or scan types. For example, the user may need to execute a command only on data from a specific scanner; or only on resting-state (versus task-based) functional scans for all sessions in the study. QuNex enables such selection with a powerful filtering grammar in the study-level “batch files”, which are text files that are generated as part of the onboarding process.

Batch files contain metadata about the imaging data and various acquisition parameters (e.g. site, device vendor, group, subject ID, session ID, acquired modalities) and serve as a record of all session-specific information in a particular study. When users create the batch file through the `create_batch` command, QuNex sifts through all sessions in the study and adds the information it needs for further processing and analyses to the batch file. This makes the batch file a key hub that stores all the relevant study metadata. One of the key advantages of this approach is that users can easily execute commands on all or only a specific subset of sessions from a study by filtering the study-level batch file. **Figure 2B** visualizes the logic behind filtering data subsets from batch files and examples of a use of the `filter` parameter in a QuNex command. Information about each scan (e.g. scanner/device, institution/scan site, group, subject ID, session ID, modality, scan tag) in the batch file is provided using a `key:value` format (e.g. `group:patient`). While some keys are required for QuNex processing steps (e.g. `session`, `subject`) and are populated automatically during the onboarding process, users can add as many additional `key:value` tags as they need. The `filter` parameter in a QuNex command will search through the batch file and select only the scans with the specified `key:value` tag. This filtering can be executed

## A Scanner-to-Analytics Turnkey Workflows

Configurable Single Turnkey Command

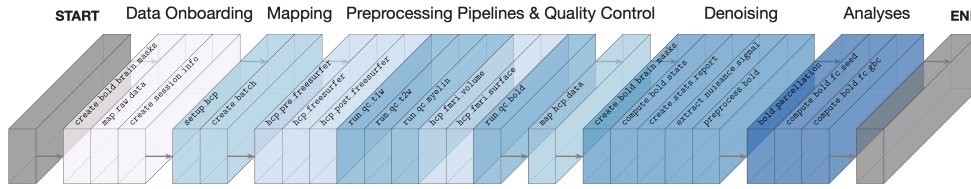

Example Command Specification

```
qunex run_turnkey \
--rawdatainput=$(RAW_DATA) \
--dataformat="DICOM" \
--batchfile=$(INPUT_BATCH_FILE) \
--mappingfile=$(INPUT_MAPPING_FILE) \
--workingdir=$(WORK_DIR) \
--projectname=$(STUDY_NAME) \
--sessions=$(SESSIONS_LIST) \
--turnkeytype="local" \
--overwriteitem="no" \
--turnkeysteps=create_study,map_raw_data,
create_session_info,setup_hcp,create_batch,
hcp_pre_freesurfer,hcp_pre_freesurfer,
hcp_post_freesurfer,run_qc_t1w,
run_qc_t2w,run_qc_myelin,
hcp_fmri_volume,hcp_fmri_surface,
create_bold_brain_masks,compute_bold_stats,
create_stats_report,extract_nuisance_signal,
preprocess_bold_bold,parcellation,
compute_bold_fc_seed,compute_bold_fc_gbc
```

## B Versatile Selection for Batch Processing

Selection Criteria Across Multiple Levels

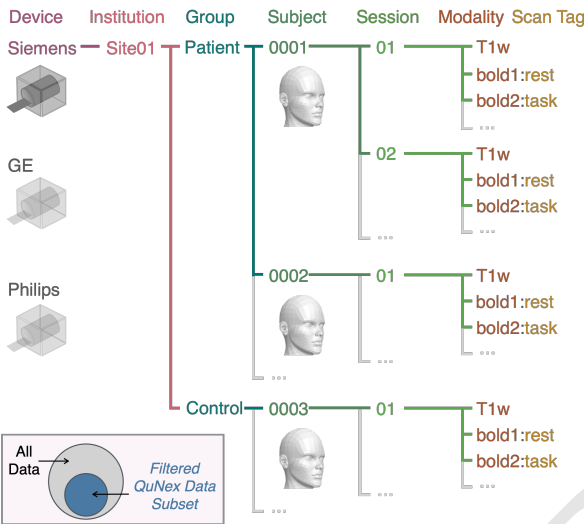

Example Tag Specification in Batch File

```
session: 0001_01
subject: 0001
group: patient
institution: Site01
device: Siemens|Prisma|166038
dicom: /StudyName/sessions/0001_01/dicom
raw_data: /StudyName/sessions/0001_01/nii
hcp: /StudyName/sessions/0001_01/hcp
01 : T1w
02 : bold1:rest :ep2d_bold_2.5TR_3.5mm
03 : bold2:task :MB_bold_2mm_1TR_MB51PAT2
...
session: 0001_02
subject: 0001
group: patient
institution: Site01
device: Siemens|Prisma|166038
dicom: /StudyName/sessions/0001_02/dicom
raw_data: /StudyName/sessions/0001_02/nii
hcp: /StudyName/sessions/0001_02/hcp
01 : T1w
02 : bold1:rest :ep2d_bold_2.5TR_3.5mm
03 : bold2:task :MB_bold_2mm_1TR_MB51PAT2
...
session: 0002_01
subject: 0002
group: patient
institution: Site01
device: Siemens|Prisma|166038
dicom: /StudyName/sessions/0002_01/dicom
raw_data: /StudyName/sessions/0002_01/nii
hcp: /StudyName/sessions/0002_01/hcp
01 : T1w
02 : bold1:rest :ep2d_bold_2.5TR_3.5mm
03 : bold2:task :MB_bold_2mm_1TR_MB51PAT2
...
session: 0003_01
subject: 0003
group: control
institution: Site01
device: Siemens|Prisma|166038
dicom: /StudyName/sessions/0003_01/dicom
raw_data: /StudyName/sessions/0003_01/nii
hcp: /StudyName/sessions/0003_01/hcp
01 : T1w
02 : bold1:rest :ep2d_bold_2.5TR_3.5mm
03 : bold2:task :MB_bold_2mm_1TR_MB51PAT2
```

Example Command Specifications

```
Filtered Data Subsets
Device: Select all data collected on Siemens Prisma scanners
qunex compute_bold_stats \
--sessions="/study_name/processing/batch.txt" \
--sessionsfolder="/study_name/sessions" \
--overwrite="no" \
--filter="device:Siemens"

Institution: Select all data collected at Site01
qunex compute_bold_stats \
--sessions="/study_name/processing/batch.txt" \
--sessionsfolder="/study_name/sessions" \
--overwrite="no" \
--filter="institution:Site01"

Group: Select all data in Patient group
qunex compute_bold_stats \
--sessions="/study_name/processing/batch.txt" \
--sessionsfolder="/study_name/sessions" \
--overwrite="no" \
--filter="group:control"

Subject: Select all data for subject 0001
qunex compute_bold_stats \
--sessions="/study_name/processing/batch.txt" \
--sessionsfolder="/study_name/sessions" \
--overwrite="no" \
--filter="subject:0001"

Session: Select all data collected at session '01'
qunex compute_bold_stats \
--sessions="/study_name/processing/batch.txt" \
--sessionsfolder="/study_name/sessions" \
--overwrite="no" \
--filter="session:01"
```

## C Native Scheduler Support for High-Throughput Parallel Processing

Scheduling QuNex Commands

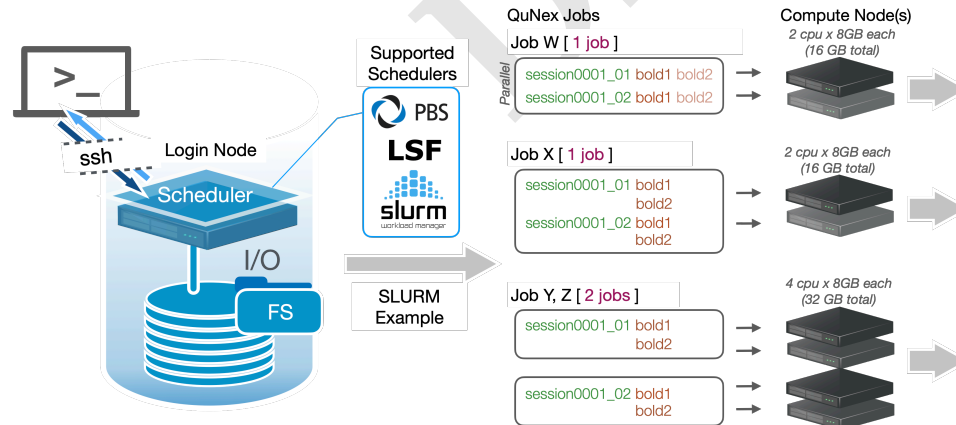

Example Command Specification

```
QuNex Example Job W
qunex compute_bold_stats \
--sessions="/study_name/processing/batch.txt" \
--sessionsfolder="/study_name/sessions" \
--overwrite="no" \
--bolds="all" \
--parjobs="1" \
--parsessions="2" \
--parelements="1" \
--scheduler="SLURM,time=4:00:00,partition=day"

QuNex Example Job X
qunex compute_bold_stats \
--sessions="/study_name/processing/batch.txt" \
--sessionsfolder="/study_name/sessions" \
--overwrite="no" \
--bolds="all" \
--parjobs="1" \
--parsessions="2" \
--parelements="2" \
--scheduler="SLURM,time=4:00:00,partition=day"

QuNex Example Jobs Y, Z
qunex compute_bold_stats \
--sessions="/study_name/processing/batch.txt" \
--overwrite="no" \
--bolds="all" \
--parjobs="2" \
--parsessions="3" \
--parelements="2" \
--scheduler="SLURM,time=4:00:00,partition=day"
```

**Fig. 2. QuNex Turnkey Functionality and Batch Engine for High-throughput Processing.** A) QuNex provides a “turnkey” engine which enables fully automated deployment of entire pipelines on neuroimaging data via a single command (`qunex run_turnkey`). An example of a typical workflow with key steps supported by the turnkey engine is highlighted, along with the example command specification. QuNex supports state-of-the-art preprocessing tools from the neuroimaging community (e.g. the HCP MPP (9)). For a detailed visual schematic of QuNex steps and commands, see **Supplementary Information** and **Figure S1**. B) The QuNex batch specification is designed to enable flexible and comprehensive “filtering” and selection of specific data subsets to process. The filtering criteria can be specified at multiple levels, such as devices (e.g. Siemens, GE, or Philips MRI scanners), institutions (e.g. scanning sites), groups (e.g. patient vs controls), subjects, sessions (e.g. time points in a longitudinal study), modalities (e.g. T1w, T2w, BOLD, diffusion), or scan tags (e.g. name of scan). C) QuNex natively supports job scheduling via LSF, SLURM, or PBS schedulers and can be easily deployed in HPC systems to handle high-throughput, parallel processing of large neuroimaging datasets. The scheduling options enable precise specification of parallelization both across sessions and within session (e.g., parallel processing of BOLD images) for optimal performance and utilization of cluster resources.

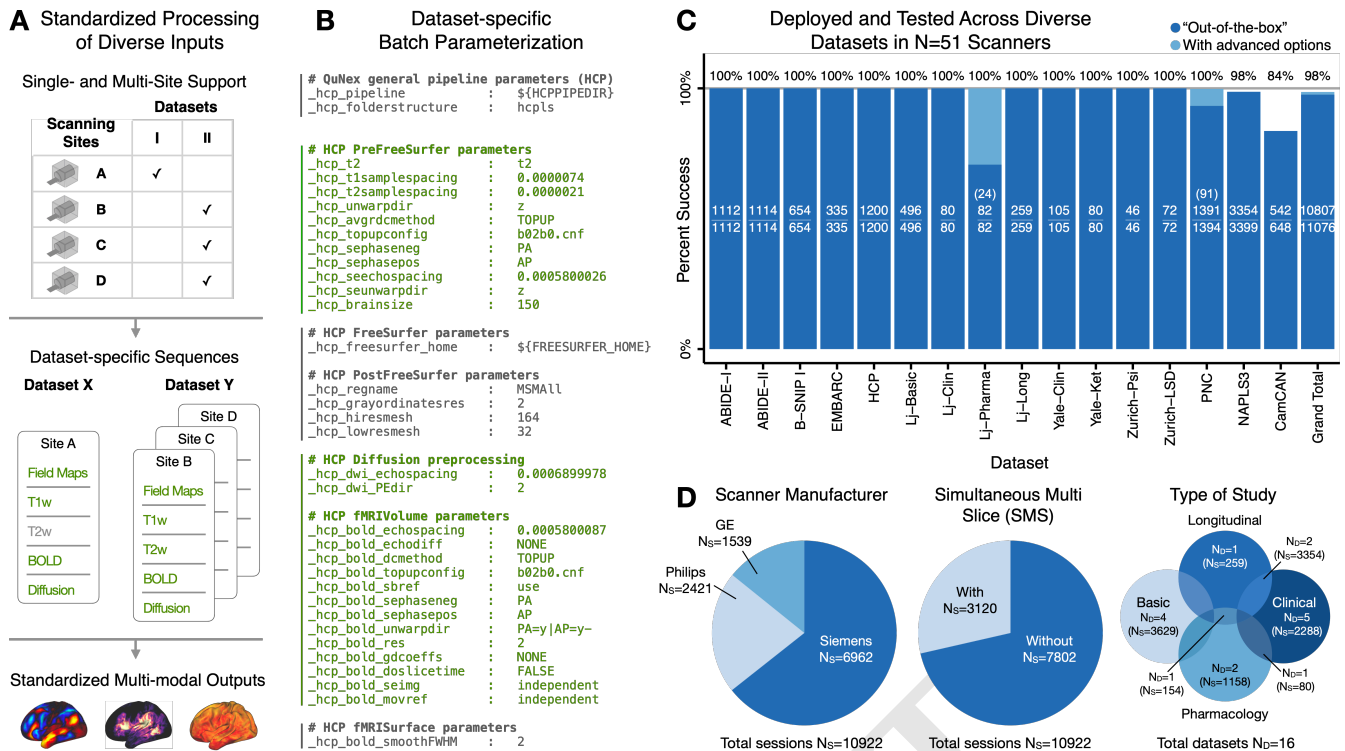

**Fig. 3. Consistent Processing at Scale and Standardized Outputs Through Batch Specification.** **A)** The batch specification mechanism in QuNex is designed to support data processing from single-site and multi-site datasets to produce standardized outputs. Acquisition parameters can be flexibly specified for each sequence. Here, example datasets I (single-site study) and II (multi-site study) illustrate possible use cases, with the sequences in each dataset shown in green text. Although Dataset I does not include T2w scans, and Dataset II contains data from different scanners, all these data can be consistently preprocessed in all modalities to produce standardized output neural features. **B)** Parameters can be tailored for each study in the header of the batch processing file. An example is shown for processing data from the HCP MPP (9). Here, parameters in green are shown tailored to Site B in Dataset Y. Detailed instructions and examples for setting up the batch parameter header is available at <https://bitbucket.org/oriadev/qunex/wiki/Overview/QuickStart.md>. **C)** QuNex has been highly successful in preprocessing data from numerous publicly available as well as private datasets, totalling over 10,000 independent scan sessions from over 50 different scanners. In some cases, advanced user options (such as custom brain masks) can be used to rescue sessions which failed with “out-of-the-box” default preprocessing options. The number of successful/total sessions is reported in each bar. The number of sessions rescued with advanced options is shown in parentheses, when applicable. The total proportion of successfully preprocessed sessions from each study (including any sessions rerun with advanced options) as well as the grand total across all studies is shown above the bar plots. **D)** QuNex has been successfully used to preprocess data with a wide range of parameters and from diverse datasets. (Left) QuNex has been tested on MRI data acquired with three major scanner manufacturers (Philips, GE and Siemens). Here  $N_S$  specifies the number of individual scan sessions that were acquired with each type of scanner. (Middle) QuNex is capable of processing images acquired both with and without simultaneous multi-slice (SMS) acquisition (also known as multi-band acquisition, i.e.: Simultaneous Multi-Slice in Siemens scanners; Hyperband in GE scanners; and Multi-Band SENSE in Philips scanners (20)). (Right) QuNex has been tested on data from clinical, pharmacology, longitudinal and basic population-based datasets. Here,  $N_D$  specifies the number of datasets;  $N_S$  specifies the total number of individual scan sessions in those datasets.

at multiple levels, from selecting all scans from a particular type of scanner to scans from only a single session. For example, setting `filter="device:Siemens"` will select all data for scans conducted by a Siemens scanner; setting `filter="session:0001_1"` will select only data from session ID 0001\_1.

### QuNex Provides Native Scheduler Support for Job Management.

Many institutions use HPC systems or cloud-based servers for processing, necessitating job management applications such as scheduler software and custom scheduling scripts (see examples in **Supplementary Information and Figure S5**). This is especially important for efficient processing of large datasets which may include thousands of sessions. While QuNex is platform-agnostic, all QuNex commands, including `run_turnkey`, are compatible with commonly used scheduling systems (SLURM, PBS and LSF) for job management in HPC systems (**Figure S6**). Thus, QuNex is easily scalable and equipped to handle high-throughput, parallel processing of large neuroimaging datasets. To

schedule a command on a cluster, users simply provide a `scheduler` parameter to any QuNex command call and the command will be executed as a job on an HPC system, eliminating the need for specialized scripts with scheduling directives. Additionally, QuNex provides parameters for users to easily customize the parallelization of their jobs from the command line call. The `parjobs` parameter specifies the total number of jobs to run in parallel; `parsessions` specifies the number of sessions to run in parallel within any single job; and `parelements` specifies the number of elements (e.g. BOLD runs) within each session to run in parallel. Users can provide the scheduling specification for their jobs to ensure that they are run in an exact way; otherwise, QuNex will automatically assign scheduling values for job parallelization, as described in **Figure S7**. **Figure 2C** shows examples of how the native scheduler support and QuNex’s parallelization parameters can be leveraged to customize the way processing is distributed across jobs. For example, specifying `parjobs=1`, `parsessions=2`, and `parelements=1` will ensure that only one job is run at a

time on the compute nodes, with two sessions running in parallel. Any individual elements within each session (e.g. multiple BOLD runs) will run serially, one at a time. This parallelization and scheduling functionality, in combination with the turnkey engine and batch specification, is extremely powerful at handling large-scale datasets while providing great flexibility and user friendliness in optimizing processing to maximally utilize HPC resources. Through a single QuNex command line call, a user can onboard, process and analyse thousands of scans on an HPC system in a parallel manner, drastically reducing the amount of time and effort required for neuroimaging datasets of scale.

### Parameter Specification Environment Enables Reproducible Workflows of Multi-modal Datasets.

The diversity of neuroimaging parameters can lead to challenges in replicating preprocessing choices and thus affect the reproducibility of results. QuNex supports consistent specification and documentation of parameter values by storing this information in the parameter header of batch files (see **Figure 3B** for an example). Many parameters in neuroimaging pipelines are the same across different steps or commands, or across different command executions (e.g. if data for the same study/scanner are processed sequentially). By providing these parameters and their values in the batch files, users are assured that shared parameters will use the same value across pipeline steps. Furthermore, such specification enables complete transparency and reproducibility, as processing workflows can be fully replicated by using the same batch files, and the batch files themselves can be easily shared between researchers. For convenience, an alternative way of providing parameters is through the CLI call; if a parameter is defined both in the batch file and in the CLI call, the version in the CLI call takes precedence.

Preprocessing functions are typically executed on multiple sessions at the same time so that they can run in parallel. As mentioned above, QuNex utilizes batch files to define processing parameters, in order to facilitate batch processing of sessions. This batch file specification allows QuNex to produce standardized outputs from data across different studies while allowing for differences in acquisition parameters (e.g. in a multi-site study, where scanner manufacturers may differ across sites). **Figure 3A** illustrates two example use-case datasets. Dataset I is a single-site study in which field maps, T1w, BOLD, and diffusion scans (green text) were acquired, but no T2w scan was collected. Dataset II is a multi-site study in which the scanning protocol included T2w acquisition for all scan sites. The flexibility of the QuNex batch parameter specification enables all data from these different studies and scanners to be preprocessed consistently and produce consistent outputs in all modalities. **Figure 3B** illustrates an example of a real-world batch parameter specification. Here, the green text highlights parameter values which are customized according to the input data (e.g. sample spacing, readout direction), while grey text show parameters that are usually standard for all datasets. This information is included in the header of a batch file, and is followed by the session-level information (as shown in **Figure 2B**) for all sessions.

QuNex's track record speaks to the effectiveness of this approach. QuNex has been used to preprocess and analyze data from a large number of public and private neuroimaging datasets (**Figure 3C**) (4). To date, we have internally used QuNex to process more than 10,000 independent scan sessions from over 50 different scanners. **Figure 3D** shows that the data differ in terms of the scanner manufacturer (Philips, GE or Siemens), acquisition technique (simultaneous multi-slice/multi-band), and the study purpose (clinical, basic, longitudinal and pharmacology studies). These datasets also span participants from different stages of development, from children to older adults. Across these diverse datasets, the percentage of successfully processed sessions is extremely high: 100% in the majority of studies and ~98.5% in total across all studies. Of note, QuNex supports the preprocessing efforts of major neuroimaging consortia and is used by the Connectome Coordination Facility (CCF) to preprocess all Lifespan and Connectomes Related to Human Disease (CRHD) datasets (4).

### QuNex Supports Extraction of Multi-modal Features at Multiple Spatial Scales.

Feature engineering is a critical choice in neuroimaging studies and features can be computed across multiple spatial scales. Importantly, given the challenges with mapping reproducible brain-behavioral relationships (3), selecting the right features at the appropriate scale is vital for optimizing signal-to-noise in neural data and producing reproducible results. QuNex enables feature generation and extraction at different levels of resolution (including "dense" full-resolution, parcels, or whole-brain networks) for both volume and CIFTI (combined surface and volume) representations of data, consistently across multiple modalities, for converging multi-modal neuroimaging analytics. While some parcellations are currently distributed with QuNex (such as the Glasser MMP (23), CAB-NP (22) and atlases distributed within FSL/FreeSurfer) users are free to provide and use their own parcellation. **Figure 4** shows convergent multi-modal results in a sample of N=339 unrelated young adults. Myelin (T1w/T2w) maps reflect higher myelination in sensorimotor areas such as primary visual and sensorimotor networks, and lower myelination in higher-order association networks (**Figure 4A**) (24). DMRI measures are able to capture the white matter connectivity structure through tract termination (14) and maximal intensity projection (MIP) of the left arcuate fasciculus (**Figure 4B**); as well as structural connectivity (23). For example, seed-based structural connectivity of Broca's area (26, 27) highlights connections to canonical language areas such as Wernicke's area (28), superior temporal gyrus and sulcus (29, 30), and frontal language regions (27, 31) (**Figure 4C**). This is consistent with the results of seed-based functional connectivity of Broca's area from resting-state fMRI data in the same individuals (**Figure 4D**); and furthermore, it is aligned with the activation patterns from a language task (**Figure 4E**) (25). Across modalities, QuNex supports the extraction of metrics as raw values (e.g. Pearson's r or Fisher's Z for functional connectivity; probabilistic tractography streamline counts for structural connectivity; t-values for task activation contrasts)

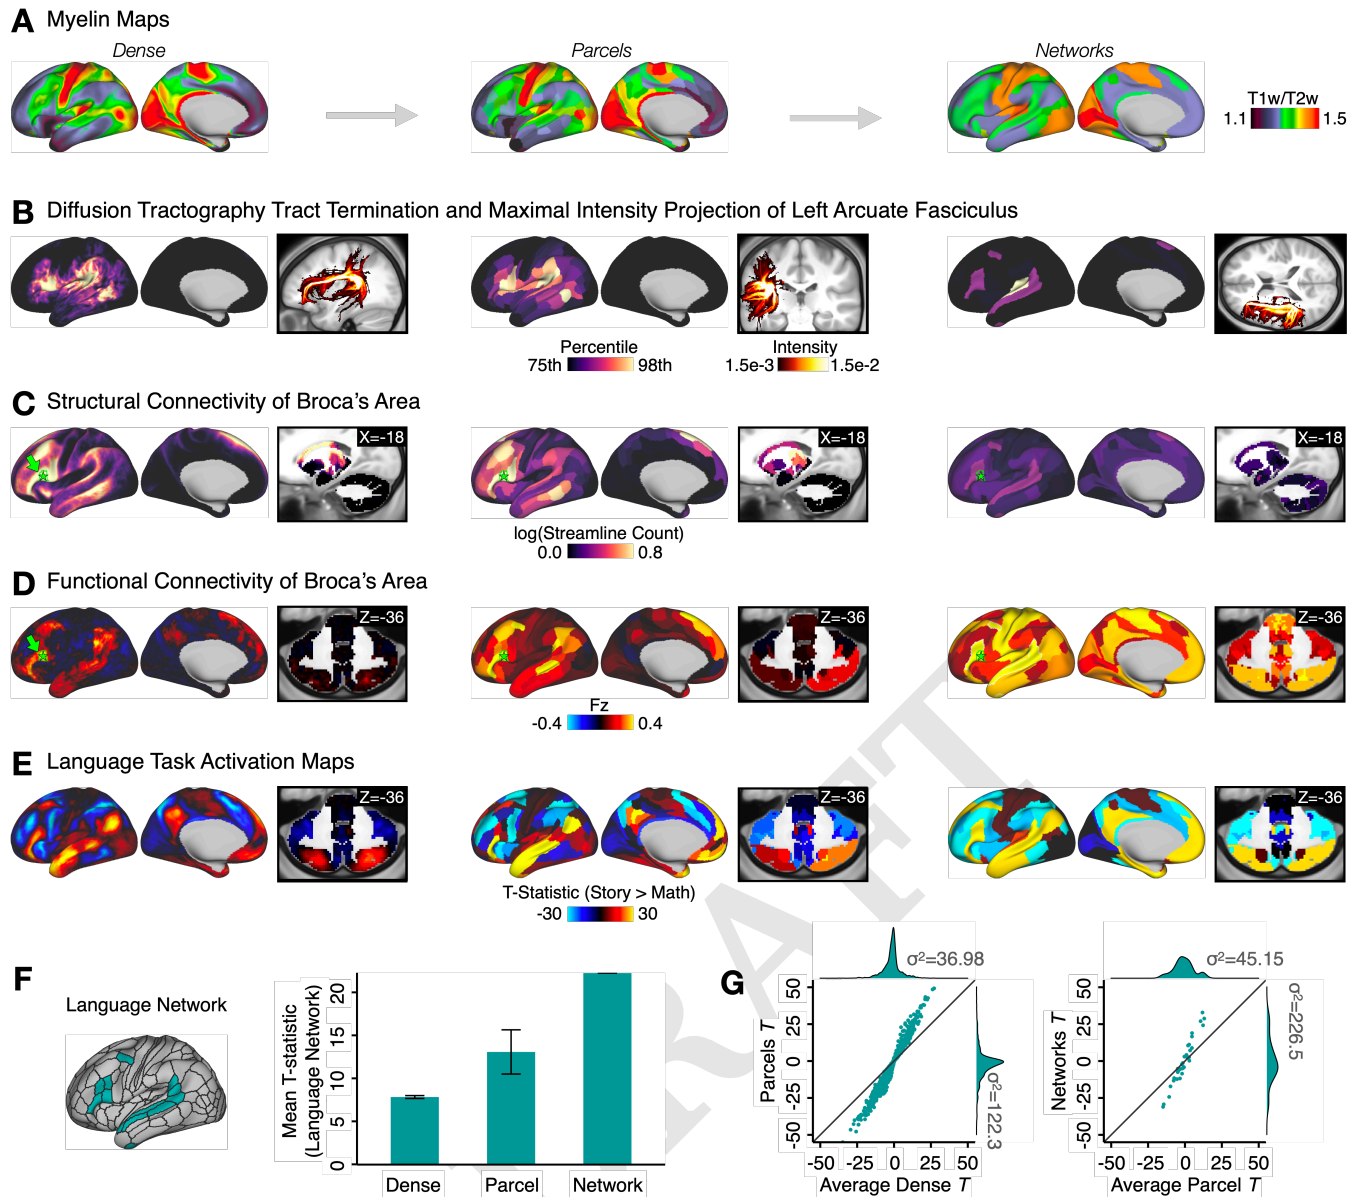

**Fig. 4. Extracting Multi-modal Processing Features at Multiple Levels of Resolution.** Output features from multiple modalities are shown, as an example of a cross-modal analysis that may be done for a study. Here, features were computed from a cohort of  $N=339$  unrelated subjects from the Human Connectome Project (21). In addition to cross-modality support, QuNex offers feature extraction at “dense” (i.e. full-resolution), parcel-level and network-level resolutions. All features are shown below at all three resolutions. We used the Cole-Anticevic Brainwide Network Parcellation (CAB-NP) (22, 23), computed using resting-state functional connectivity from the same cohort and validated and characterized extensively in (22). **A**) Myelin maps, estimated using the ratio of T1w/T2w images (24). **B**) Left arcuate fasciculus computed via diffusion tractography (14). Surface views show the cortical tract termination (white-grey matter boundary endpoints) and volume views show the maximal intensity projection. **C**) Structural connectivity of Broca’s area (parcel corresponding to Brodmann’s Area [BA] 44, green star) (23). **D**) Resting-state functional connectivity of Broca’s area (green star). For parcel- and network-level maps, resting-state data were first parcellated before computing connectivity. **E**) Task activation maps for the “Story versus Math” contrast in a language processing task (25). For parcel- and network-level maps, task fMRI data were first parcellated before model fitting. **F**) Left: Whole-brain Language network from the CAB-NP (22). (Right) The mean t-statistic within Language network regions from the “Story versus Math” contrast (shown in panel E) improves when data are first parcellated at the parcel-level relative to dense-level data and shows the greatest improvement when data are first parcellated at the network-level. Error bars show the standard error. **G**) (Left) T-statistics computed on the average parcel beta estimates are higher compared to the average T-statistics computed over dense estimates of the same parcel. (Right) Similarly, T-statistics computed on beta estimates for the network are higher than the average of T-statistics computed across parcels within each network.

409 or standardized Z-scores.

410 Notably, features across all modalities can be extracted in a  
 411 consistent, standardized format after preprocessing and post-  
 412 processing within QuNex. This enables frictionless compari-  
 413 son of features across modalities, e.g. for multi-modal, multi-  
 414 variate analyses.

415 **QuNex Enables Single-Session Modelling of**  
 416 **Time-series Modalities.** Modelling of time-series data,  
 417 such as BOLD, at the single-session level can be used for  
 418 a variety of functions, including nuisance regression and  
 419 extracting task activation for individual subjects. QuNex  
 420 supports denoising and modelling of time-series data at  
 421 the single-session level via a general linear model (GLM)

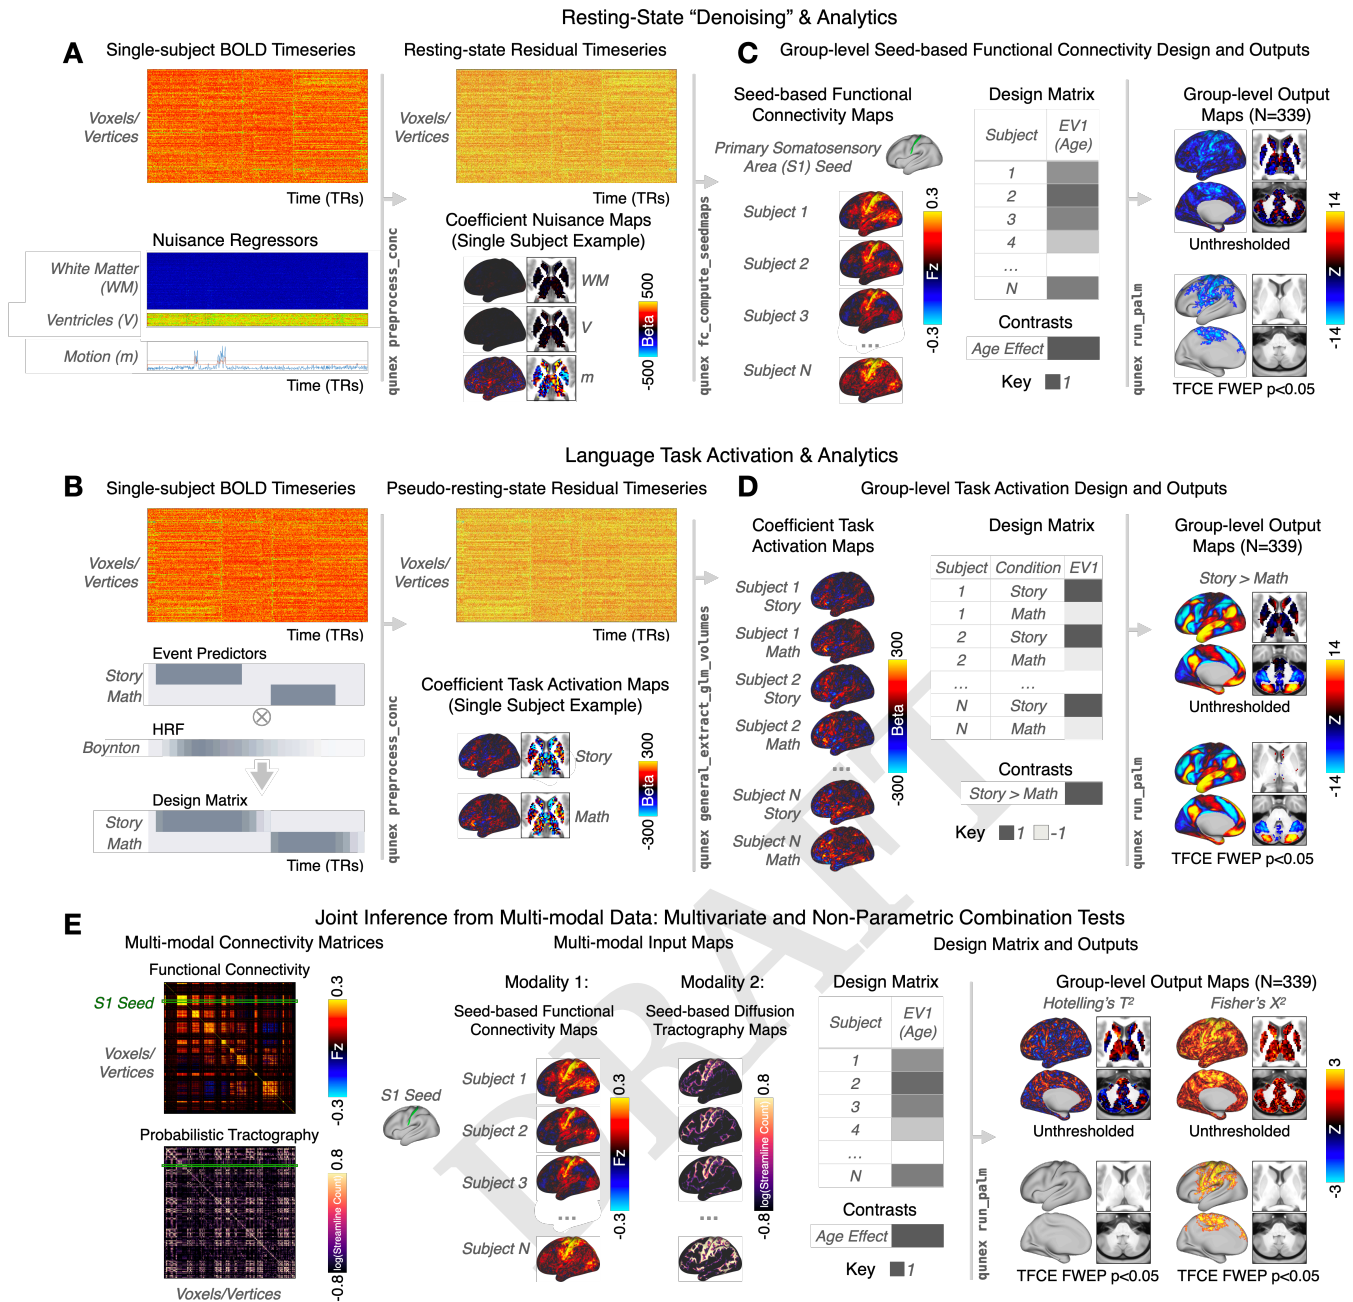

**Fig. 5. General Linear Model (GLM) for Single-Session Modelling of Time-series Modalities and Integrated Interoperability with PALM for Group-Level Analytics.**

**A**) The QuNex GLM framework enables denoising and/or event modeling of resting-state and task BOLD images at the individual-session level in a single step. A use case is shown for resting-state BOLD data. At the single-subject level, individual nuisance regressors (such as white matter and ventricular signal and motion parameters) can be specified such that they are regressed out of the BOLD timeseries with the `qunex_preprocess_conc` function. The regressors can be per-frame (as shown), per-trial, or even per-block. The GLM outputs a residual timeseries of “denoised” resting-state data as well as one coefficient map per nuisance regressor. The resting-state data for each subject can then be used to calculate subject-specific feature maps, such as seed-based functional connectivity maps with `qunex_fc_compute_seedmaps`. **B**) The GLM engine can also be used for complex modeling and analysis of task events, following a similar framework. Event modeling is specified in `qunex_preprocess_conc` by providing the associated event file; the method of modeling can be either assumed (using a hemodynamic response function [HRF]) or unassumed. Here, an example from the HCP’s Language task is shown. The two events, “Story” and “Math”, are convolved with the Boynton HRF to build the subject-level GLM. As with the resting-state use case shown in **A**, the GLM outputs the single-subject residual timeseries (in this case ‘pseudo-resting state’) as well as the coefficient maps for each regressor, here the Story and Math tasks. **C**) Connectivity maps from all subjects can then be entered into a group-level GLM analysis. In this example, the linear relationship between connectivity from the primary somatosensory area (S1) seed and age across subjects is tested in a simple GLM design with one group and one explanatory variable (EV) covariate, demeaned age. QuNex supports flexible group-level GLM analyses with non-parametric tests via Permutation Analysis of Linear Models (PALM, (12)), through the `qunex_run_palm` function. The specification of the GLM and individual contrasts is completely configurable and allows for flexible and specific hypothesis testing. Group-level outputs include full uncorrected statistical maps for each specified contrast as well as p-value maps that can be used for thresholding. Significance for group-level statistical maps can be assessed with the native PALM support for TFCE ((12), shown) or cluster statistics with familywise error protection (FWE). **D**) The subject-level task coefficient maps can then be input into the `qunex_run_palm` command along with the group-level design matrix and contrasts. The group-level output maps show the differences in activation between the Story and Math conditions. **E**) QuNex also supports multi-variate and joint inference tests for testing hypotheses using data from multiple modalities, such as BOLD signal and DWI. Example connectivity matrices are shown for these two modalities, with the S1 seed highlighted. Similar to the use cases shown above, maps from all subjects can be entered into a group-level analysis with a group-level design matrix and contrasts using the `qunex_run_palm` command. In this example, the relationship between age and S1-seeded functional connectivity and structural connectivity is assessed using a Hotelling’s  $T^2$  test and Fisher’s  $X^2$ . The resulting output maps show the unthresholded and thresholded ( $p < 0.05$  FWE, 10,000 permutations) relationship between age and both neural modalities.



framework, executed through the `preprocess_conc` command. Here we demonstrate this framework with functional BOLD time-series. **Figure 5A** showcases a use case where resting-state BOLD data are first denoised and then used to compute seed-based functional connectivity maps of the primary somatosensory area (S1). During the denoising step, the user can choose which sources of nuisance signal to remove (including motion parameters and their derivatives and BOLD signals extracted from ventricles, white matter, whole brain or any other custom defined regions, and their first derivatives). These nuisance signals are included as covariates in the GLM, which produces, for each BOLD run, residual time-series data as well as coefficient maps for all specified regressors. The denoised time-series can then be used for further analytics, e.g. by computing seed-based functional connectivity (using the `fc_compute_seedmaps` command). For task data, QuNex facilitates the building of design matrices at the single session-level (**Figure 5B**). The design matrices can combine task regressors created by convolving a haemodynamic response function (HRF, e.g. Boynton, double Gaussian) with event timeseries – in the example case the Story and Math blocks of a language task (25) are modelled for each session – separate regressors for each frame of the trial, supporting unassumed modeling of task response, as well as nuisance timeseries. The events in assumed and unassumed modelling can be individually weighted, enabling estimates of trial-by-trial correlation with e.g. response reaction time, accuracy or precision. The GLM engine estimates the model and outputs both a residual time-series (“pseudo-resting state”) as well as coefficient maps for each regressor, reflecting task activation for each of the modelled events. After a model has been estimated, it is possible to compute both predicted and residual timeseries with an arbitrary combination of regressors from the estimated model (e.g. residual that retains transient task response after removal of sustained task response and nuisance regressors).

**QuNex Supports Built-In Interoperability with Externally-Developed Tools.** QuNex is designed to provide interoperability between community tools to remove barriers between different stages of neuroimaging research. One such feature is its compatibility with XNAT (eXtensible Neuroimaging Archive Toolkit) (32, 33), a widely used platform for research data transfer, archiving, and sharing (**Figure S8**). This enables researchers to seamlessly organize, process, and manage their imaging studies in a coherent integrated environment. Another interoperability feature is the execution of group-level statistical testing of neuroimaging maps, which is performed through Permutation Analysis of Linear Models (PALM) (12), an externally-developed tool which executes nonparametric permutation-based significance testing for neuroimaging data. QuNex provides a smooth interface for multi-level modelling via PALM, which supports volume-based NIFTI, surface-based GIFTI, and surface-volume hybrid CIFTI images, and allows for fully customizable statistical tests with a host of familywise error protection and spatial statistics options. Within QuNex, PALM is called through

the `qunex_run_palm` command, which provides a cohesive interface for specifying inputs, outputs, and options. The user is able to customize design matrices and contrasts according to their need and provide these along with QuNex-generated neural maps to assess for significance using permutation testing and familywise error protection. **Figure 5C** illustrates an example where S1-seed functional connectivity maps for N=339 sessions are tested at the group-level to show a significant negative relationship with age in areas such as the somatomotor cortices ( $p < 0.05$ , nonparametrically tested and family-wise error protected with threshold-free cluster enhancement (TFCE) (34)). As with functional connectivity maps, task activation maps can be tested for significant effects in the group-level GLM with PALM **Figure 5D**. Here, a within-subject t-test of the Story > Math contrast reveals significant areas of the language network, also shown in **Figure 4E-F**. QuNex additionally supports joint inference from combined multi-modal data via multivariate statistical tests (e.g. MANOVAs, MANCOVAs) and non-parametric combination tests (35), also executed through PALM and thus compatible with permutation testing. For example, seed-based functional connectivity and structural connectivity of area S1 from the same individuals can be entered into the same test as separate modalities. The second-level GLM shown in **Figure 5E** is the same one as in **Figure 5B** to test for age effects. Such joint inference tests can be used to test whether there are jointly significant differences on a set of modalities. Thus, QuNex enables streamlined workflows for multi-modal neuroimaging feature generation and integrated multivariate statistical analyses. QuNex workflows simplify neuroimaging data management and analysis across a wide range of clinical, translational, and basic neuroimaging studies, including translational studies examining the relationship between neuroimaging features and gene expression or symptom presentation, or pharmacological neuroimaging studies of mechanism. **Figure S9** highlights a few examples of recently published studies which leveraged QuNex for preprocessing, feature generation, and analytics.

QuNex also encourages future integration of open source community tools via the extensions framework, through which researchers can integrate their own tools and pipelines into the QuNex platform (**Supplementary Information**). To continually engage community participation in neuroimaging tool development, QuNex provides a SDK that includes helper functions for users to set up a development and testing environment (**Figure S10**).

**Cross-Species Support for Translational Neuroimaging.** Studies of non-human species have substantially contributed to the understanding of the central nervous system, and provide a crucial opportunity for translational science. In particular, the macaque brain is phylogenetically similar to the human brain, and comparative neuroimaging studies in macaques have served to inform and validate human neuroimaging results. It is thus imperative to develop and distribute tools for consistent processing and analytics of non-human neuroimaging data for aiding translational cross-species neuroimaging studies (36, 37). To this end, QuNex

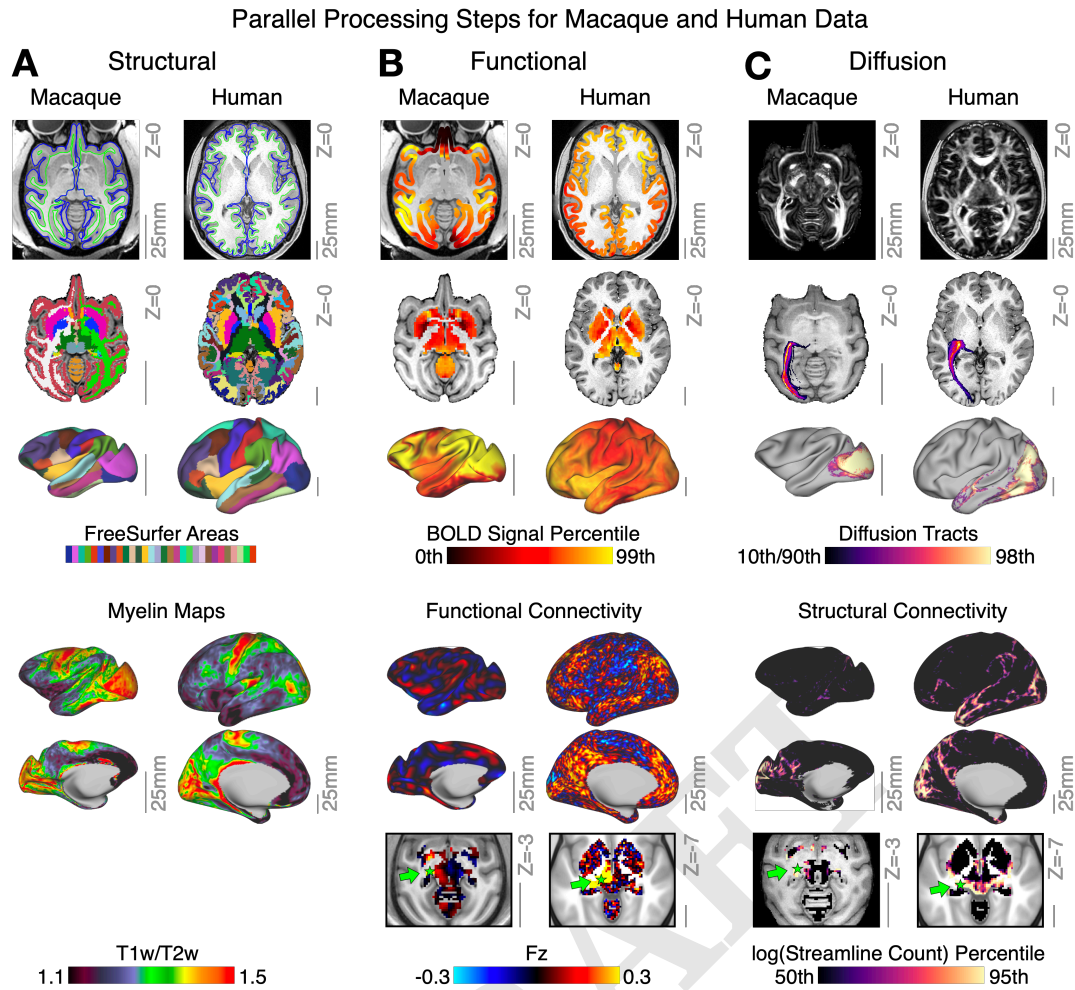

**Fig. 6. QuNex Enables Neuroimaging Workflows Across Different Species.** **A)** Structural features for exemplar macaque and human data, including surface reconstructions and segmentation from FreeSurfer. Lower panel shows output myelin (T1w/T2w) maps. **B)** Functional features for exemplar macaque and human showing BOLD signal mapped to both volume and surface. Lower panels show and resting-state functional connectivity seeded from the lateral geniculate nucleus of the thalamus (green arrow). **C)** Diffusion features for exemplar macaque and human data, showing whole-brain fractional anisotropy, and volume and surface terminations of the left optic radiation tract. Lower panels show the structural connectivity maps seeded from the lateral geniculate nucleus of the thalamus (green arrow). Grey scale reference bars in each panel are scaled to 25mm.

536 supports analogous workflows for human and non-human 554  
 537 primate neuroimaging data. **Figure 6** shows parallel steps 555  
 538 for running HCP-style preprocessing and generating multi- 556  
 539 modal neural features in human and macaque data. Struc- 557  
 540 tural data outputs include FreeSurfer segmentation and 558  
 541 labelling of cortical and subcortical areas, T1w/T2w myelin 559  
 542 maps (**Figure 6A**), and structural metrics such as cortical 560  
 543 thickness, curvature, and subcortical volumes. Functional 561  
 544 data outputs include BOLD signal and metrics such as func- 562  
 545 tional connectivity (**Figure 6B**). Diffusion metrics include 563  
 546 measures of microstructure (e.g. fractional anisotropy maps), 564  
 547 white matter tracts and their cortical termination maps, and 565  
 548 whole-brain structural connectivity, as shown in **Figure 6C**). 566  
 549 Currently, QuNex supports macaque diffusion pipelines in 567  
 550 the released container, with HCP macaque functional neuro- 568  
 551 imaging pipelines in development for a future release. The 569  
 552 functional macaque images shown here are obtained from an 570  
 553 early development version of the pipelines. 571

## Discussion

The popularity of neuroimaging research has led to the devel-  
 opment and availability of many tools and pipelines, many of  
 which are specific to one modality. This in turn has led to  
 challenges in method integration, particularly across differ-  
 ent neuroimaging sub-fields. Additionally, the wide avail-  
 ability of different pipeline and preprocessing/analytic choices  
 may contribute to difficulties with producing replicable re-  
 sults (13). Thus, QuNex is designed to be an integrative  
 platform with interoperability for externally-developed tools  
 across multiple neuroimaging modalities. It leverages exist-  
 ing state-of-the-art neuroimaging tools and software pack-  
 ages, with a roadmap for continued integration of new tools  
 and features. Additionally, QuNex provides features such as  
 turnkey functionality, native scheduler support, flexible data  
 filtering and selection, multi-modal integration, and trans-  
 species support, to fully support and reduce friction in neuro-  
 imaging workflows.

572 It should be noted that there are currently several tools in  
 573 the neuroimaging community with multi-modality support,

574 including (but not limited to) FSL, SPM, Freesurfer, AFNI, 630  
575 Brain Voyager, and PALM. These softwares all offer pre- 631  
576 processing and/or analytic capabilities for at least 3 different 632  
577 neural modalities, such as T1w, T2w, myelin, BOLD, arte- 633  
578 rial spin labelling (ASL), DWI, EEG, MEG, and functional  
579 near-infrared spectroscopy (fNIRS). Rather than reinvent the 634  
580 wheel, QuNex builds upon the decades of research, optimiza- 635  
581 tion, and validation of these tools by using them as basic 636  
582 building blocks for fundamental steps of neuroimaging work- 637  
583 flows, and augments their functionality and interoperabil- 638  
584 ity. Other high-level environments, such as HCP MPP (9), 639  
585 UK Biobank pipelines (38), fMRIPrep (10), QSIPrep (11), 640  
586 micapipe (39), nipype (17), BrainVoyager (40), FuNP (41), 641  
587 NeuroDebian (42), and LONI (43), also leverage other neuro- 642  
588 imaging tools as building blocks. Many of these options are 643  
589 uni-modal preprocessing pipelines (e.g. fMRIPrep, QSIPrep) 644  
590 or preprocessing pipelines developed for specific consortia 645  
591 (HCP, UKBiobank pipelines). We emphasize that QuNex 646  
592 is a unifying framework for integrating multi-modal, multi- 647  
593 species neuroimaging tools and workflows, rather than a 648  
594 choice of preprocessing or analytic pipeline; as such, QuNex  
595 can incorporate these options, as evidenced by the current  
596 integration of the HCP MPP and the planned integration 649  
597 of fMRIPrep. Furthermore, QuNex offers additional user- 650  
598 friendly features which expand upon the existing function- 651  
599 ality of these tools, including flexible data filtering, turnkey 652  
600 functionality, support for cloud and HPC deployment, native 653  
601 scheduling and parallelization options, and collaborative de- 654  
602 velopment tools. A list of the implementations for different 655  
603 functionalities in QuNex, as well as comparable implemen- 656  
604 tations in other neuroimaging pipelines and environments, is  
605 shown in **Figure S11**.

606 In addition, several commercial platforms are available for 657  
607 neuroimaging data management and analytics (e.g. Flywheel 658  
608 (44), QMENTA, Nordic Tools, Ceretype), especially for clin- 659  
609 ical applications. While these platforms offer a wide range of 660  
610 neuroinformatics functionalities, they are difficult to evalu- 661  
611 ate due to their high cost of services and proprietary content. 662  
612 On the contrary, QuNex is free to use for non-commercial 663  
613 research, with transparent and collaborative code and devel- 664  
614 opment. 665  
666

615 **Software and Data Availability.** The QuNex container, 667  
616 SDK, and online documentation are available at [qunex.](https://qunex.yale.edu) 668  
617 [yale.edu](https://qunex.yale.edu). The community forum is hosted at [forum.](https://forum.qunex.yale.edu) 669  
618 [qunex.yale.edu](https://forum.qunex.yale.edu). 670  
671

619 **Limitations and Future Directions.** Neuroimaging is an 672  
620 actively advancing field and QuNex is committed to contin- 673  
621 ual development and advancement of neuroimaging methods. 674  
622 Below we list features and existing external software which 675  
623 are currently under development/integration, as well as those 676  
624 which are staged for future release. As neuroimaging techn- 677  
625 niques advance and novel tools and methods are developed 678  
626 and adopted, we plan to integrate them into the QuNex plat- 679  
627 form either through internal development or via the exten- 680  
628 sions framework. 681

629 *Currently under development:* Longitudinal preprocessing; 682

mouse neuroimaging preprocessing and analytics; EEG pre-  
processing and analytics.

*Staged for development:* PET preprocessing and analytics;  
BIDS exporter; fMRIPrep.

## Acknowledgments

We would like to thank Dr. Anderson Winkler and Dr. Vale-  
rio Zerbi for their contributionz to QuNex development.

Financial support for this study was provided by NIH grants  
DP5OD012109-01 (to A.A.), 1U01MH121766 (to A.A.),  
R01MH112746 (to J.D.M.), 5R01MH112189 (to A.A.),  
5R01MH108590 (to A.A.), NIAAA grant 2P50AA012870-  
11 (to A.A.), NSF NeuroNex grant 2015276 (to J.D.M.), the  
Brain and Behavior Research Foundation Young Investiga-  
tor Award (to A.A.), SFARI Pilot Award (to J.D.M. & A.A.),  
BlackThorn Therapeutics (to J.D.M. & A.A.), the European  
Research Council (Consolidator Grant 101000969 to S.N.S.  
and S.W.), Wellcome Trust (Grant 217266/Z/19/Z to S.N.S.)  
and the Slovenian Research Agency (ARRS) (Grant Nos. J7-  
8275, J7-6829, P3-0338 to G.R.).

## Author Contributions

J.L.J., J.D., S.W., S.N.S., A.A., and G.R. prepared the initial  
blockout of the manuscript. J.L.J. and J.D. prepared the fig-  
ures and the initial draft of the manuscript. A.A. and G.R.  
supervised this research. All authors helped with contributed  
to the development of the QuNex platform. All authors re-  
viewed and approved the final version of the manuscript.

## Competing Interests

J.L.J. has previously worked for Neumora (formerly Black-  
Thorn Therapeutics) and is a co-inventor on the following  
patent: Anticevic A, Murray JD, Ji JL: Systems and Meth-  
ods for Neuro-Behavioral Relationships in Dimensional Ge-  
ometric Embedding (N-BRIDGE), PCT International Appli-  
cation No. PCT/US2119/022110, filed March 13, 2019. C.F.,  
A.K., and A.M have previously consulted for Neumora (for-  
merly BlackThorn Therapeutics). J.D. and Z.T. have previ-  
ously consulted for Neumora (formerly BlackThorn Thera-  
peutics) and consult for Manifest Technologies. M.H. is an  
employee of Manifest Technologies. J.D.M. and A.A. con-  
sult for and hold equity with Neumora (formerly BlackThorn  
Therapeutics), Manifest Technologies, and are co-inventors  
on the following patents: Anticevic A, Murray JD, Ji JL: Sys-  
tems and Methods for Neuro-Behavioral Relationships in Di-  
mensional Geometric Embedding (N-BRIDGE), PCT Inter-  
national Application No. PCT/US2119/022110, filed March  
13, 2019 and Murray JD, Anticevic A, Martin, WJ: Methods  
and tools for detecting, diagnosing, predicting, prognosti-  
cating, or treating a neurobehavioral phenotype in a sub-  
ject, U.S. Application No. 16/149,903 filed on October 2,  
2018, U.S. Application for PCT International Application  
No. 18/054,009 filed on October 2, 2018. G.R. consults for  
and holds equity with Neumora (formerly BlackThorn Thera-  
peutics) and Manifest Technologies. The other authors report  
no competing interests.



- 854 44. Tinashe M Tapera, Matthew Cieslak, Max Bertolero, Azeez Adebimpe, Geoffrey K Aguirre, 940  
855 Ellyn R Butler, Philip A Cook, Diego Davila, Mark A Elliott, Sophia Linguiti, et al. Flywheel- 941  
856 tools: Data curation and manipulation on the flywheel platform. *Frontiers in neuroinform-* 942  
857 *ics*, page 26, 2021. 943
- 858 45. Mark Jenkinson, Peter Bannister, Michael Brady, and Stephen Smith. Improved optimiza- 944  
859 tion for the robust and accurate linear registration and motion correction of brain images. 945  
860 *Neuroimage*, 17(2):825–841, 2002. 946
- 861 46. Martin Reuter, Nicholas J Schmansky, H Diana Rosas, and Bruce Fischl. Within-subject 947  
862 template estimation for unbiased longitudinal image analysis. *Neuroimage*, 61(4):1402– 948  
863 1418, 2012. 949
- 864 47. Jie Lisa Ji, Caroline Diehl, Charles Schleifer, Carol A Tamminga, Matcheri S Keshavan, 950  
865 John A Sweeney, Brett A Clementz, S Kristian Hill, Godfrey Pearlson, Genevieve Yang, 951  
866 Gina Creatura, John H Krystal, Grega Repovš, John Murray, Anderson Winkler, and Alan 952  
867 Anticevic. Schizophrenia Exhibits Bi-directional Brain-Wide Alterations in Cortico-Striato- 953  
868 Cerebellar Circuits. *Cerebral Cortex*, 06 2019. ISSN 1047-3211. doi: 10.1093/cercor/ 954  
869 bhy306. 955
- 870 48. Jie Lisa Ji, Markus Helmer, Clara Fonteneau, Joshua B Burt, Zailyn Tamayo, Jure Demšar, 956  
871 Brendan D Adkinson, Aleksandar Savić, Katrin H Preller, Flora Moujaes, et al. Mapping 957  
872 brain-behavior space relationships along the psychosis spectrum. *Elife*, 10, 2021. 958
- 873 49. Gholamreza Salimi-Khorshidi, Gwenaelle Douaud, Christian F Beckmann, Matthew F 959  
874 Glasser, Ludovica Griffanti, and Stephen M Smith. Automatic denoising of functional mri 960  
875 data: combining independent component analysis and hierarchical fusion of classifiers. 961  
876 *Neuroimage*, 90:449–468, 2014. 962
- 877 50. Jonathan D Power, Kelly Anne Barnes, Abraham Z Snyder, Bradley L Schlaggar, and 963  
878 Steven E Petersen. Steps toward optimizing motion artifact removal in functional connectiv- 964  
879 ity mri: a reply to carp. *Neuroimage*, 76, 2013. 965
- 880 51. Jie Lisa Ji, Caroline Diehl, Charles Schleifer, Carol A Tamminga, Matcheri S Keshavan, 966  
881 John A Sweeney, Brett A Clementz, S Kristian Hill, Godfrey Pearlson, Genevieve Yang, 967  
882 et al. Schizophrenia exhibits bi-directional brain-wide alterations in cortico-striato-cerebellar 968  
883 circuits. *Cerebral Cortex*, 29(11):4463–4487, 2019. 969
- 884 52. Jeffrey R Binder, William L Gross, Jane B Allendorfer, Leonardo Bonilha, Jessica Chapin, 970  
885 Jonathan C Edwards, Thomas J Grabowski, John T Langfitt, David W Loring, Mark J Lowe, 971  
886 et al. Mapping anterior temporal lobe language areas with fmri: a multicenter normative 972  
887 study. *Neuroimage*, 54(2):1465–1475, 2011. 973
- 888 53. Geoffrey M Boynton, Stephen A Engel, Gary H Glover, and David J Heeger. Linear systems 974  
889 analysis of functional magnetic resonance imaging in human v1. *Journal of Neuroscience*, 975  
890 16(13):4207–4221, 1996. 976
- 891 54. Jesper LR Andersson, Stefan Skare, and John Ashburner. How to correct susceptibility 977  
892 distortions in spin-echo echo-planar images: application to diffusion tensor imaging. *Neu-* 978  
893 *roimage*, 20(2):870–888, 2003. 979
- 894 55. Jesper LR Andersson and Stamatis N Sotiropoulos. An integrated approach to correction 980  
895 for off-resonance effects and subject movement in diffusion mr imaging. *Neuroimage*, 125: 981  
896 1063–1078, 2016. 982
- 897 56. Saad Jbabdi, Stamatis N Sotiropoulos, Alexander M Savio, Manuel Graña, and Timothy EJ 983  
898 Behrens. Model-based analysis of multishell diffusion mr data for tractography: How to get 984  
899 over fitting problems. *Magnetic resonance in medicine*, 68(6):1846–1855, 2012. 985
- 900 57. Timothy EJ Behrens, H Johansen Berg, Saad Jbabdi, Matthew FS Rushworth, and Mark W 986  
901 Woolrich. Probabilistic diffusion tractography with multiple fibre orientations: What can we 987  
902 gain? *neuroimage*, 34(1):144–155, 2007. 988
- 903 58. Rogier B Mars, Stamatis N Sotiropoulos, Richard E Passingham, Jerome Sallet, Lennart 989  
904 Verhagen, Alexandre A Khrapitchev, Nicola Sibson, and Saad Jbabdi. Whole brain compar- 990  
905 ative anatomy using connectivity blueprints. *Elife*, 7:e35237, 2018. 991
- 906 59. Michael P Milham, Lei Ai, Bonhwang Koo, Ting Xu, Céline Amiez, Fabien Ballezeau, Mark G 992  
907 Baxter, Erwin LA Blezer, Thomas Brochier, Aihua Chen, et al. An open resource for non- 993  
908 human primate imaging. *Neuron*, 100(1):61–74, 2018. 994
- 909 60. Joonas A Autio, Matthew F Glasser, Takayuki Ose, Chad J Donahue, Matteo Bastiani, 995  
910 Masahiro Ohno, Yoshihiko Kawabata, Yuta Urushibata, Katsutoshi Murata, Kantaro Nishig- 996  
911 ori, et al. Towards hcp-style macaque connectomes: 24-channel 3t multi-array coil, mri 997  
912 sequences and preprocessing. *Neuroimage*, 215:116800, 2020. 998
- 913 61. Nicole Eichert, Emma C Robinson, Katherine L Bryant, Saad Jbabdi, Mark Jenkinson, 999  
914 Longchuan Li, Kristine Krug, Kate E Watkins, and Rogier B Mars. Cross-species cortical 1000  
915 alignment identifies different types of anatomical reorganization in the primate temporal 1001  
916 lobe. *Elife*, 9:e53232, 2020. 1002
- 917 62. David C Van Essen. Windows on the brain: the emerging role of atlases and databases in 1003  
918 neuroscience. *Current opinion in neurobiology*, 12(5):574–579, 2002. 1004
- 919 63. Adriana Di Martino, Chao-Gan Yan, Qingyang Li, Erin Denio, Francisco X Castellanos, Kaat 1005  
920 Alaerts, Jeffrey S Anderson, Michal Assaf, Susan Y Bookheimer, Mirella Dapretto, et al. 1006  
921 The autism brain imaging data exchange: towards a large-scale evaluation of the intrinsic 1007  
922 brain architecture in autism. *Molecular psychiatry*, 19(6):659, 2014. 1008
- 923 64. Adriana Di Martino, David O'Connor, Bosi Chen, Kaat Alaerts, Jeffrey S Anderson, Michal 1009  
924 Assaf, Joshua H Balsters, Leslie Baxter, Anita Beggato, Sylvie Bernaerts, et al. Enhanc- 1010  
925 ing studies of the connectome in autism using the autism brain imaging data exchange ii. 1011  
926 *Scientific data*, 4(1):1–15, 2017. 1012
- 927 65. Carol A Tamminga, Godfrey Pearlson, Matcheri Keshavan, John Sweeney, Brett Clementz, 1013  
928 and Gunvant Thaker. Bipolar and schizophrenia network for intermediate phenotypes: out- 1014  
929 comes across the psychosis continuum. *Schizophrenia bulletin*, 40(Suppl\_2):S131–S137, 1015  
930 2014. 1016
- 931 66. Madhukar H Trivedi, Patrick J McGrath, Maurizio Fava, Ramin V Parsey, Benji T Kurian, 1017  
932 Mary L Phillips, Maria A Oquendo, Gerard Bruder, Diego Pizzagalli, Marisa Toups, et al. 1018  
933 Establishing moderators and biosignatures of antidepressant response in clinical care (em- 1019  
934 barc): Rationale and design. *Journal of psychiatric research*, 78:11–23, 2016. 1020
- 935 67. Theodore D Satterthwaite, Mark A Elliott, Kosha Ruparel, James Loughead, Karthik Prab- 1021  
936 hakaran, Monica E Calkins, Ryan Hopson, Chad Jackson, Jack Keefe, Marisa Riley, et al. 1022  
937 Neuroimaging of the philadelphia neurodevelopmental cohort. *Neuroimage*, 86:544–553, 1023  
938 2014. 1024
- 939 68. Jean Addington, Lu Liu, Kali Brummitt, Carrie E Bearden, Kristin S Cadenhead, Barbara A 1025
- Cornblatt, Matcheri Keshavan, Daniel H Mathalon, Thomas H McLaughan, Diana O Perkins, et al. North american prodrome longitudinal study (napls 3): methods and baseline description. *Schizophrenia research*, 2020.
69. Katrin H Preller, Patricia Duerler, Joshua B Burt, Jie Lisa Ji, Brendan Adkinson, Philipp Stämpfli, Erich Seifritz, Grega Repovš, John H Krystal, John D Murray, et al. Psilocybin induces time-dependent changes in global functional connectivity. *Biological psychiatry*, 88(2):197–207, 2020.
70. Katrin H Preller, Joshua B Burt, Jie Lisa Ji, Charles H Schleifer, Brendan D Adkinson, Philipp Stämpfli, Erich Seifritz, Grega Repovš, John H Krystal, John D Murray, et al. Changes in global and thalamic brain connectivity in lsd-induced altered states of consciousness are attributable to the 5-HT<sub>2A</sub> receptor. *Elife*, 7:e35082, 2018.
71. Julien Lamy, Romain Lahaxe, Jean-Paul Armspach, and Fabrice Heitz. Design and implementation of a generic dicom archive for clinical and pre-clinical research. In *1st MICCAI Workshop on*, page 47, 2015.
72. Xiangrui Li, Paul S Morgan, John Ashburner, Jolinda Smith, and Christopher Rorden. The first step for neuroimaging data analysis: Dicom to nifti conversion. *Journal of neuroscience methods*, 264:47–56, 2016.
73. Xiangrui Li. Xiangrui/dicom2nii: Dicom to nifti conversion, nifti tools, May 2022.
74. Brian B Avants, Nick Tustison, Gang Song, et al. Advanced normalization tools (ants). *Insight j*, 2(365):1–35, 2009.
75. Meher R Juttukonda, Binyin Li, Randa Almaktoom, Kimberly A Stephens, Kathryn M Yochim, Essa Yacoub, Randy L Buckner, and David H Salat. Characterizing cerebral hemodynamics across the adult lifespan with arterial spin labeling mri data from the human connectome project-aging. *Neuroimage*, 230:117807, 2021.
76. Anders M. Dale, Bruce Fischl, and Martin I. Sereno. Cortical surface-based analysis: I. segmentation and surface reconstruction. *NeuroImage*, 9(2):179–194, 1999. ISSN 1053-8119. doi: <https://doi.org/10.1006/nimg.1998.0395>.
77. Bruce Fischl, Niranjini Rajendran, Evelina Bosa, Jean Augustinack, Oliver Hinds, B.T. Thomas Yeo, Hartmut Mohlberg, Katrin Amunts, and Karl Zilles. Cortical Folding Patterns and Predicting Cytoarchitecture. *Cerebral Cortex*, 18(8):1973–1980, 12 2007. ISSN 1047-3211. doi: 10.1093/cercor/bhm225.
78. Florent Ségonne, Eric Grimson, and Bruce Fischl. A genetic algorithm for the topology correction of cortical surfaces. In Gary E. Christensen and Milan Sonka, editors, *Information Processing in Medical Imaging*, pages 393–405. Berlin, Heidelberg, 2005. Springer Berlin Heidelberg. ISBN 978-3-540-31676-3.
79. JLR Andersson, J Xu, E Yacoub, E Auerbach, S Moeller, and K Ugurbil. A comprehensive gaussian process framework for correcting distortions and movements in diffusion images. In *Proceedings of the 20th Annual Meeting of ISMRM*, volume 20, page 2426, 2012.
80. Stamatis N. Sotiropoulos, Saad Jbabdi, Junqian Xu, Jesper L. Andersson, Steen Moeller, Edward J. Auerbach, Matthew F. Glasser, Moises Hernandez, Guillermo Sapiro, Mark Jenkinson, David A. Feinberg, Essa Yacoub, Christophe Lenglet, David C. Van Essen, Kamil Ugurbil, and Timothy E.J. Behrens. Advances in diffusion mri acquisition and processing in the human connectome project. *NeuroImage*, 80:125–143, 2013. ISSN 1053-8119. doi: <https://doi.org/10.1016/j.neuroimage.2013.05.057>. Mapping the Connectome.
81. Douglas N. Greve and Bruce Fischl. Accurate and robust brain image alignment using boundary-based registration. *NeuroImage*, 48(1):63–72, 2009. ISSN 1053-8119. doi: <https://doi.org/10.1016/j.neuroimage.2009.06.060>.
82. Jonathan D Power, Kelly A Barnes, Abraham Z Snyder, Bradley L Schlaggar, and Steven E Petersen. Spurious but systematic correlations in functional connectivity mri networks arise from subject motion. *Neuroimage*, 59(3):2142–2154, 2012.
83. Michael J Hawrylycz, Ed S Lein, Angela L Guillozet-Bongaarts, Elaine H Shen, Lydia Ng, Jeremy A Miller, Louie N Van De Lagemaat, Kimberly A Smith, Amanda Ebbert, Zackery L Riley, et al. An anatomically comprehensive atlas of the adult human brain transcriptome. *Nature*, 489(7416):391, 2012.
84. Joshua B Burt, Murat Demirtaş, William J Eckner, Natasha M Navejar, Jie Lisa Ji, William J Martin, Alberto Bernacchia, Alan Anticevic, and John D Murray. Hierarchy of transcriptomic specialization across human cortex captured by structural neuroimaging topography. *Nature neuroscience*, 21(9):1251, 2018.
85. Michael W Cole, Sudhir Pathak, and Walter Schneider. Identifying the brain's most globally connected regions. *Neuroimage*, 49(4):3132–3148, 2010.

## Methods

### Description of the Preprocessing Validation Datasets.

We tested preprocessing using QuNex on a total of 16 datasets, including both publicly-available and aggregated internal datasets. For each dataset, we prepared batch files with parameters specific to the study (or site, if the study is multi-site and acquisition parameters differed between sites). We then used QuNex commands to run all sessions through the HCP Minimal Preprocessing Pipelines (MPP) for structural (T1w images; T2w if available), functional data, and diffusion data (if available). A brief description of each dataset in **Figure 3** is in the **Supplementary Information**. Additional details on diffusion datasets and preprocessing can also be found below.

1014 **Preprocessing of Validation Datasets.** All datasets<sup>1071</sup>  
1015 were preprocessed using QuNex with the HCP MPP (9)<sup>1072</sup>  
1016 (`qunex hcp_pre_freesurfer`; `hcp_freesurfer`;<sup>1073</sup>  
1017 `hcp_post_freesurfer`; `hcp_fmri_volume`;<sup>1074</sup>  
1018 `hcp_fmri_surface`). A summary of the HCP Pipelines<sup>1075</sup>  
1019 is as follows: the T1w structural images were first aligned<sup>1076</sup>  
1020 by warping them to the standard Montreal Neurological<sup>1077</sup>  
1021 Institute-152 (MNI-152) brain template in a single step,<sup>1078</sup>  
1022 through a combination of linear and non-linear transforma-<sup>1079</sup>  
1023 tions via the FMRIB Software Library (FSL) linear image<sup>1080</sup>  
1024 registration tool (FLIRT) and non-linear image registration<sup>1081</sup>  
1025 tool (FNIRT) (45). If a T2w was present, it was co-registered<sup>1082</sup>  
1026 to the T1w image. If field maps were collected, these were<sup>1083</sup>  
1027 used to perform distortion correction. Next, FreeSurfer's<sup>1084</sup>  
1028 recon-all pipeline was used to segment brain-wide gray and<sup>1085</sup>  
1029 white matter to produce individual cortical and subcortical<sup>1086</sup>  
1030 anatomical segmentations (46). Cortical surface models were<sup>1087</sup>  
1031 generated for pial and white matter boundaries as well as<sup>1088</sup>  
1032 segmentation masks for each subcortical grey matter voxel.<sup>1089</sup>  
1033 The T2w image was used to refine the surface tracing. Using<sup>1090</sup>  
1034 the pial and white matter surface boundaries, a 'cortical<sup>1091</sup>  
1035 ribbon' was defined along with corresponding subcortical<sup>1092</sup>  
1036 voxels, which were combined to generate the neural file in<sup>1093</sup>  
1037 the Connectivity Informatics Technology Initiative (CIFTI)<sup>1094</sup>  
1038 volume/surface 'grayordinate' space for each individual<sup>1095</sup>  
1039 subject (9). BOLD data were motion-corrected by aligning<sup>1096</sup>  
1040 to the middle frame of every run via FLIRT in the initial<sup>1097</sup>  
1041 NIFTI volume space. Next a brain-mask was applied to<sup>1098</sup>  
1042 exclude signal from non-brain tissue. Next, cortical BOLD<sup>1099</sup>  
1043 data were converted to the CIFTI gray matter matrix by<sup>1100</sup>  
1044 sampling from the anatomically-defined gray matter cortical<sup>1101</sup>  
1045 ribbon and subsequently aligned to the HCP atlas using<sup>1102</sup>  
1046 surface-based nonlinear deformation (9). Subcortical voxels<sup>1103</sup>  
1047 were aligned to the MNI-152 atlas using whole-brain non-<sup>1104</sup>  
1048 linear registration and then the Freesurfer-defined subcortical<sup>1105</sup>  
1049 segmentation was applied to isolate the CIFTI subcortex.<sup>1106</sup>  
1050 For datasets without field maps and/or a T2w image,<sup>1107</sup>  
1051 we used a version of the MPP adapted for compatibility<sup>1108</sup>  
1052 with "legacy" data, featured as a standard option in the<sup>1109</sup>  
1053 HCP Pipelines provided by the QuNex team ([https://github.com/Washington-University/](https://github.com/Washington-University/HCPpipelines/pull/156)<sup>1110</sup>  
1054 [HCPpipelines/pull/156](https://github.com/Washington-University/HCPpipelines/pull/156)). The adaptations for<sup>1111</sup>  
1055 single-band BOLD acquisition have been described in prior<sup>1112</sup>  
1056 publications (47, 48). Briefly, adjustments include allowing<sup>1113</sup>  
1057 the HCP MPP to be conducted without high-resolution reg-<sup>1114</sup>  
1058 istration using T2w images and without optional distortion<sup>1115</sup>  
1059 correction using field maps. For validation of preprocessing<sup>1116</sup>  
1060 via QuNex, we counted the number of sessions in each study<sup>1117</sup>  
1061 which successfully completed the HCP MPP versus the<sup>1118</sup>  
1062 number of sessions which errored during the pipeline.<sup>1119</sup>  
1063

1064 **Description of the Datasets Used for Analytics.** *HCP*<sup>1122</sup>  
1065 *Young Adults (HCP-YA) Dataset.* To demonstrate neuroimag-<sup>1123</sup>  
1066 ing analytics and feature generation in human data, we used<sup>1124</sup>  
1067  $N=339$  unrelated subjects from the HCP-YA cohort (21). The  
1068 functional data from these subjects underwent additional pro-<sup>1125</sup>  
1069 cessing and removal of artifactual signal after the HCP MPP.<sup>1126</sup>  
1070 These steps included ICA-FIX (9, 49) and movement scrub<sup>1127</sup>

bing (50) as done in our prior work (48, 51). We combined  
the four 15-min resting-state BOLD runs in order of acquisi-  
tion, after first demeaning each run individually and remov-  
ing the first 100 frames to remove potential magnetization ef-  
fects (22). Seed-based functional connectivity was computed  
using `qunex fc_compute_seedmaps` and calculated as  
the Fisher's Z-transformed Pearson's r-value between the  
seed region BOLD time-series and time-series in the rest of  
brain. Task activation maps were computed from a language  
processing task (25), derived from (52). Briefly, the task con-  
sisted of two runs, each with 4 blocks of 3 conditions: (i)  
Sentence presentation with detection of semantic, syntactic  
and pragmatic violations; (ii) Story presentation with com-  
prehension questions ('Story' condition); (iii) Math problems  
involving sets of arithmetic problems and response periods  
( 'Math' condition). Trials were presented auditorily and par-  
ticipants chose one of two answers by pushing a button. Task-  
evoked signal for the Language task was computed by fitting  
a GLM to preprocessed BOLD time series data with `qunex`  
`preprocess_conc`. Two predictors were included in the  
model for the 'Story' and 'Math' blocks, respectively. Each  
block was approximately 30s in length and the sustained ac-  
tivity across each block was modeled using the Boynton HRF  
(53). Results shown here are from the Story versus Math  
contrast (22, 23). Across all tests, statistical significance was  
assessed with PALM (12) via `qunex run_palm`. Briefly,  
threshold-free cluster enhancement was applied (34) and the  
data were randomly permuted 5,000 times to obtain a null  
distribution. All contrasts were corrected for family-wise er-  
ror. Diffusion data from this dataset were first preprocessed  
with the HCP MPP (9) via `qunex hcp_diffusion`,  
including susceptibility and eddy-current induced distor-  
tion and motion correction (54, 55) and the estimation of  
dMRI to MNI-152 (via the T1wandersson2016integrated  
space) registration fields. Next, fiber orientations were  
modelled for up to three orientations per voxel using the  
FSL's bedpostX crossing fibers diffusion model. (56,  
57), via `qunex dwi_bedpostx_gpu`. After regis-  
tering to the standard space, whole brain probabilistic  
tractography was run with FSL's probtrackx via `qunex`  
`dwi_probtracx_dense_gpu`, producing a dense con-  
nectivity matrix for the full CIFTI space. Further, we esti-  
mated 42 white matter fibre bundles, and their cortical ter-  
mination maps, for each subject via XTRACT (14). Follow-  
ing individual tracking, resultant tracts were group-averaged  
by binarizing normalized streamline path distributions at a  
threshold and averaging binary masks across the cohort to  
give the percentage of subjects for which a given tract is  
present at a given voxel. For all tracts except the middle cere-  
bellar peduncle (MCP), which is not represented in CIFTI  
surface file formats, the cortical termination map was esti-  
mated using connectivity blueprints, as described in (58).  
These maps reflect the the termination points of the corre-  
sponding tract on the white-grey matter boundary surface.

*Non-human Primate Macaque Datasets.* Neural data from  
two macaques (one in vivo, one ex vivo) are shown. Struc-  
tural (T1w, T2w, myelin) and functional BOLD data were ob-

1128 tained from a session in the publicly-available PRIMatE Data<sub>1184</sub>  
1129 Exchange (PRIME-DE) repository (59), specifically from the<sub>1185</sub>  
1130 University of California-Davis dataset. In this protocol, sub-<sub>1186</sub>  
1131 jects were anesthetized with ketamine, dexmedetomidine, or<sub>1187</sub>  
1132 buprenorphine prior to intubation and placement in stereo-<sub>1188</sub>  
1133 taxic frame with 1-2% isoflurane maintenance anesthesia<sub>1189</sub>  
1134 during the scanning protocol. They underwent 13.5 min of<sub>1190</sub>  
1135 resting-state BOLD acquisition (gradient echo voxel size:<sub>1191</sub>  
1136 1.4×1.4×1.4mm; TE: 24ms; TR: 1600ms; FOV = 140mm)<sub>1192</sub>  
1137 as well as T1w (voxel size: 0.3×0.3×0.3mm; TE: 3.65ms;<sub>1193</sub>  
1138 TR: 2500ms; TI: 1100ms; flip angle: 7°), T2w (voxel size:<sub>1194</sub>  
1139 0.3×0.3×0.3mm; TE: 307ms; TR: 3000ms), spin-echo field<sub>1195</sub>  
1140 maps, and diffusion on a Siemens Skyra 3T scanner with a<sub>1196</sub>  
1141 4-channel clamshell coil. Preprocessing steps are consistent<sub>1197</sub>  
1142 with the HCP MPP and described in detail in (18, 60).<sub>1198</sub>  
1143 The high-resolution macaque diffusion data shown<sub>1199</sub>  
1144 were obtained ex vivo and have been previously de-<sub>1200</sub>  
1145 scribed (14, 58, 61) and are available via PRIME-DE<sub>1201</sub>  
1146 ([http://fcon\\_1000.projects.nitrc.org/](http://fcon_1000.projects.nitrc.org/indi/PRIME/oxford2.html)<sub>1202</sub>  
1147 [indi/PRIME/oxford2.html](http://fcon_1000.projects.nitrc.org/indi/PRIME/oxford2.html)). The brains were soaked<sub>1203</sub>  
1148 in phosphate-buffered saline before scanning and placed in<sub>1204</sub>  
1149 fomblin or fluorinert during the scan. Data were acquired at<sub>1205</sub>  
1150 the University of Oxford on a 7T magnet with an Agilent<sub>1206</sub>  
1151 DirectDrive console (Agilent Technologies, Santa Clara,<sub>1207</sub>  
1152 CA, USA) using a 2D diffusion-weighted spin-echo protocol<sub>1208</sub>  
1153 with single line readout (DW-SEMS, TE/TR: 25ms/10s;<sub>1209</sub>  
1154 matrix size: 128×128; resolution: 0.6×0.6mm; number<sub>1210</sub>  
1155 of slices: 128; slice thickness: 0.6mm). Diffusion data<sub>1211</sub>  
1156 were acquired over the course of 53 hours. For each<sub>1212</sub>  
1157 subject, 16 non-diffusion-weighted ( $b=0\text{s/mm}^2$ ) and 128<sub>1213</sub>  
1158 diffusion-weighted ( $b=4000\text{s/mm}^2$ ) volumes were acquired<sub>1214</sub>  
1159 with diffusion directions distributed over the whole sphere.<sub>1215</sub>  
1160 FA maps were registered to the standard F99 space (62)<sub>1216</sub>  
1161 using FNIRT. As with the human data, the macaque diffusion<sub>1217</sub>  
1162 data were modelled using the crossing fibre model from<sub>1218</sub>  
1163 bedpostX and used to inform tractography. Again, 42 white<sub>1219</sub>  
1164 matter fibre bundles, and their cortical termination maps,<sub>1220</sub>  
1165 were estimated using XTRACT.<sub>1221</sub>

1166 **Functional Parcellation and Seed Definitions.** We used<sub>1223</sub>  
1167 the Cole-Anticevic Brain-wide Network Partition (CAB-NP)<sub>1224</sub>  
1168 (22), based on the HCP MMP (23), for definitions of func-  
1169 tional networks (e.g. the Language network) and parcels  
1170 in the cortex and subcortex. Broca's Area was defined as<sub>1225</sub>  
1171 Brodmann's Area 44, corresponding to the parcel labelled<sub>1226</sub>  
1172 "L\_44\_ROI" in the HCP MMP and "Language-14\_L-Ctx" in<sub>1227</sub>  
1173 the CAB-NP (23). The left Primary Somatosensory Area<sub>1228</sub>  
1174 (S1) region was defined as Brodmann's Area 1 and corre-<sub>1229</sub>  
1175 sponds to the parcel labelled "L\_1\_ROI" in the HCP MMP<sub>1230</sub>  
1176 and "Somatomotor-29\_L-Ctx" in the CAB-NP (23).<sub>1231</sub>

1177 **Design and Features for Open Science.** QuNex is devel-<sub>1233</sub>  
1178 oped in accordance to modern standards in software engi-<sub>1234</sub>  
1179 neering. Adhering to these standards results in a consistently<sub>1235</sub>  
1180 structured, well documented and strictly versioned platform.<sub>1236</sub>  
1181 All QuNex code is open and well commented which both<sub>1237</sub>  
1182 eases and encourages community development. Furthermore,<sub>1238</sub>  
1183 our Git repositories use the GitFlow branching model which,<sub>1239</sub>

besides keeping our repositories neat and tidy, also helps  
with the process of merging community developed features  
into our solution. QuNex has an extensive documentation,  
both in the form of inline help, accessible from CLI and a  
Wiki page. Inline documentation offers a short description  
of all QuNex commands and their parameters while the Wiki  
documentation offers a number of tutorials and more exten-  
sive usage guides. Furthermore, users can establish a direct  
communication with QuNex developers through the official  
QuNex forum (<https://forum.qunex.yale.edu/>),  
where they can get additional support and discuss or sug-  
gest possible new features or anything else QuNex related.  
To assure maximum possible levels of tractability and repro-  
ducibility, QuNex is versioned by using the semantic ver-  
sioning process (<https://semver.org/>). The QuNex  
platform is completely free and open source – QuNex source  
code is licensed under the GPL (GNU General Public Li-  
cense). Furthermore, QuNex is not only open by nature, but  
also by design. In other words, we did not simply open up the  
QuNex code base, we developed it to be as open and acces-  
sible as possible. To open up QuNex to the neuroinformat-  
ics community, we designed a specialized extensions frame-  
work. This framework supports development in multiple pro-  
gramming languages (e.g. Python, MATLAB, R, Bash) and  
was built with the sole intention to ease the integration of  
custom community based processing and analysis commands  
into the QuNex platform. Extensions developed through this  
extensions framework can access all the tools and utilities  
(e.g. the batch turnkey engine, logging, scheduling ...) resid-  
ing in the core QuNex code. Once developed, QuNex Exten-  
sions are seamlessly attached to the QuNex platform and ran  
in the same fashion as all existing QuNex commands. Our  
end goal is to fold the best extensions into our core codebase  
and thus have a community supported, organically growing  
neuroimaging platform. As mentioned, to ease this process  
we have also prepared an SDK, which includes the guidelines  
and tools that should both speed up the extension develop-  
ment process and make extensions code more consistent with  
the core QuNex code. This will then allow for faster adoption  
of QuNex Extensions into the core codebase. See **Figure S10**  
for visualization of the QuNex Extensions framework.

Since QuNex and other similar platforms depend on a num-  
ber of software tools which are developed independently, as-  
suring complete reproducibility can be a challenging task  
since researchers are required to track and archive all the  
dependencies. To alleviate this issue we publish a con-  
tainer along each unique QuNex version. As a result, us-  
ing the container for processing and analysis allows users to  
achieve complete reproducibility by tracking a single number  
– the version of the QuNex platform used in processing and  
analysis. QuNex containers are not only important because  
they offer complete transparency and reproducibility, through  
them users can execute their studies on a number of different  
platforms and systems (e.g. HPC system, cloud services, PC,  
etc.). Just like the QuNex source code, QuNex containers are  
also completely free and open to the research community.

1240 **Containerization and Deployment.** Through containeriza-1292  
1241 tion, QuNex is fully platform-agnostic and comes in the form-1293  
1242 of both Docker and Singularity containers. This offer sev-1294  
1243 eral advantages to end users. First, the QuNex container-1295  
1244 includes all of the required dependencies, packages and li-1296  
1245 braries which greatly reduces the time a user needs to setup-1297  
1246 everything and start processing. Second, the QuNex con-1298  
1247 tainer is meticulously versioned and archived, which guar-1299  
1248 antees complete reproducibility of methods. Last but not-1300  
1249 least, containers can be run on practically every modern op-1301  
1250 erating system (e.g. Windows, macOS, Linux) and can be  
1251 deployed on any hardware configuration (e.g. desktop com-1302  
1252 puter, laptop, cloud, high performance computing system).<sup>1303</sup>  
1253 Users can easily execute the QuNex container via the in-1304  
1254 cluded `qunex_container` script, which removes com-1305  
1255 mon technical barriers to connecting a container with the op-1306  
1256 erating system. Furthermore, when running studies on an  
1257 HPC system users need to manually configure the parame-1307  
1258 ters of the underlying scheduling system, which can be again  
1259 a tedious task for those that are not familiar with schedul-1308  
1260 ing system. To alleviate this issue, the `qunex_container`<sup>1309</sup>  
1261 script offers native support for several popular job schedulers  
1262 (SLURM, PBS, LSF).<sup>1310</sup>  
<sup>1311</sup>

1263 **QuNex Commands.** A detailed list and a short description  
1264 of all commands, along with a visualization of how com-  
1265 mands can be chained together, can be found in the **Supple-**  
1266 **mentary Information.** Here, we specify a short description  
1267 for each of the functional groups of QuNex commands.

1268 **Study creation, data onboarding and mapping.** This group of  
1269 commands serves for setting up a QuNex study and its folder  
1270 structure, importing your data into the study and preparing all  
1271 the support files required for processing.

1272 **HCP Pipelines.** These commands incorporate everything re-  
1273 quired for executing the whole HCP MPP along with some  
1274 additional HCP Pipelines commands. Commands sup-  
1275 port the whole HCP MPP along with some additional pro-  
1276 cessing and denoising commands. Below is a very brief  
1277 overview of each pipeline, for details please consult the  
1278 manuscript prepared by Glasser et al. (9) and the offi-  
1279 cial HCP Pipelines repository ([https://github.com/](https://github.com/Washington-University/HCPpipelines)  
1280 [Washington-University/HCPpipelines](https://github.com/Washington-University/HCPpipelines)). See  
1281 **Figure S3** for a visualization of HCP Pipelines implemen-  
1282 tation in QuNex.

1283 **Quality control.** QuNex contains commands through which  
1284 users can execute visual QC for a number of commonly used  
1285 MRI modalities – raw NIfTI, T1w, T2w, myelin, BOLD,  
1286 DWI, eddyQC, etc.

1287 **Diffusion analyses.** QuNex also includes functionality for  
1288 processing images acquired through DWI. These commands  
1289 prepare the data for a number of common DWI analyses in-  
1290 cluding diffusion tensor imaging (DTI) and probabilistic trac-  
1291 tography.

**BOLD analyses.** Before running task-evoked and resting-  
state functional connectivity analyses, BOLD data needs to  
be additionally preprocessed. First, all the relevant data needs  
to be prepared – BOLD brain masks need to be created,  
BOLD image statistics need to be computed and processed  
and nuisance signals need to be extracted. These data are  
then used to process the images, which might include spatial  
smoothing, temporal high and/or low pass filtering, assumed  
HRF and unassumed HRF task modeling and regression of  
undesired nuisance and task signal.

**Permutation Analysis of Linear Models (PALM).** The main  
purpose of this group of commands is to allow easier use of  
results and outputs generated by QuNex in various PALM  
(12) analyses (e.g. second-level statistical analysis and vari-  
ous types of statistical tests).

**Mice pipelines.** QuNex contains a set of commands for on-  
boarding and preprocessing rodent MRI data (typically in the  
Bruker format). Results of the mice preprocessing pipelines  
can be then analysed using the same set of commands as with  
human data.
